# Supplementary material for: Rapid MRSA detection via tandem mass spectrometry of the intact 80 kDa PBP2a resistance protein
Source: PubMed Central journal article supplement (PMC8443585; doi:10.1038/s41598-021-97844-w), 2021-09-15

## **Supplemental Information**

### **Title**

Rapid MRSA detection via tandem mass spectrometry of the intact 80kDa PBP2a resistance protein

### **Authors**

Jason R Neil<sup>1</sup>, Arvind Verma<sup>2</sup>, Scott R. Kronewitter<sup>1</sup>, William M. McGee<sup>1</sup>, Christopher Mullen<sup>3</sup>, Marjaana Viirtola<sup>2</sup>, Annika Kotovuori<sup>2</sup>, Herdis Friedrich<sup>2</sup>, Johan Finell<sup>2</sup>, Joni Rannisto<sup>2</sup>, John E. P. Syka<sup>3</sup>, James L. Stephenson Jr.<sup>1\*</sup>

\* Corresponding author

Corresponding author email address: jim.stephenson@thermofisher.com

### **Affiliations**

<sup>1</sup>Thermo Fisher Scientific, Cambridge, MA, United States of America

<sup>2</sup>Thermo Fisher Scientific, Vantaa, Finland

<sup>3</sup>Thermo Fisher Scientific, San Jose, CA, United States of America

Supplemental Table S1.

Observed wild-type PBP2<sub>mecA</sub> precursor ions during LC-separation and MS detection, associated charge states, and estimated intact protein masses (kDa).

| <b>Precursor (m/z)</b> | <b>Charge State</b> | <b>Estimated Mass</b> |
|------------------------|---------------------|-----------------------|
| 749.0506               | 108                 | 80789.46              |
| 756.0164               | 107                 | 80786.75              |
| 763.1251               | 106                 | 80785.26              |
| 770.4351               | 105                 | 80790.69              |
| 777.7800               | 104                 | 80785.12              |
| 785.3582               | 103                 | 80788.89              |
| 793.0142               | 102                 | 80785.45              |
| 800.8558               | 101                 | 80785.44              |
| 808.8633               | 100                 | 80786.33              |
| 817.0276               | 99                  | 80786.73              |
| 825.3572               | 98                  | 80787.01              |
| 833.8500               | 97                  | 80786.45              |
| 842.5315               | 96                  | 80787.02              |
| 851.3875               | 95                  | 80786.81              |
| 860.4332               | 94                  | 80786.72              |
| 869.6699               | 93                  | 80786.30              |
| 879.1185               | 92                  | 80786.90              |
| 888.8340               | 91                  | 80792.89              |
| 898.6044               | 90                  | 80784.40              |
| 908.6761               | 89                  | 80783.17              |
| 919.0220               | 88                  | 80785.94              |
| 929.5832               | 87                  | 80786.74              |
| 940.3804               | 86                  | 80786.71              |
| 951.4436               | 85                  | 80787.71              |
| 962.7549               | 84                  | 80787.41              |
| 974.3535               | 83                  | 80788.34              |
| 986.1979               | 82                  | 80786.23              |
| 998.3879               | 81                  | 80788.42              |

Supplemental Table S2.

Observed recombinant His<sub>6</sub>-PBP2<sub>amecA</sub> precursor ions during static infusion and MS detection, associated charge states, and estimated intact protein mass (kDa).

| Precursor (m/z) | Charge State | Estimated Mass |
|-----------------|--------------|----------------|
| 689.4417        | 110          | 75728.59       |
| 695.7183        | 109          | 75724.29       |
| 702.0076        | 108          | 75708.82       |
| 708.4284        | 107          | 75694.84       |
| 714.9862        | 106          | 75682.54       |
| 721.6894        | 105          | 75672.39       |
| 728.4697        | 104          | 75656.85       |
| 735.4249        | 103          | 75645.76       |
| 742.4749        | 102          | 75630.44       |
| 749.6928        | 101          | 75617.97       |
| 757.0309        | 100          | 75603.09       |
| 764.5173        | 99           | 75588.21       |
| 772.1490        | 98           | 75572.60       |
| 779.9485        | 97           | 75558.00       |
| 787.8883        | 96           | 75541.28       |
| 796.0026        | 95           | 75525.25       |
| 804.2679        | 94           | 75507.18       |
| 812.7720        | 93           | 75494.80       |
| 821.3775        | 92           | 75474.73       |
| 830.2002        | 91           | 75457.22       |
| 839.2721        | 90           | 75444.49       |
| 848.0000        | 89           | 75383.00       |
| 857.8789        | 88           | 75405.34       |
| 867.4464        | 87           | 75380.84       |
| 877.3149        | 86           | 75363.08       |
| 887.4195        | 85           | 75345.66       |
| 897.7188        | 84           | 75324.38       |
| 908.2631        | 83           | 75302.84       |
| 919.0792        | 82           | 75282.49       |
| 930.1249        | 81           | 75259.12       |
| 941.4857        | 80           | 75238.86       |
| 953.0951        | 79           | 75215.51       |
| 965.0383        | 78           | 75194.99       |
| 977.0000        | 77           | 75152.00       |
| 989.7187        | 76           | 75142.62       |

Supplemental Table S3.

Observed wild-type PBP2<sub>mecA</sub> precursor ions during chromatographic separation and charge-reduced using PTCR and MS detection approach, associated charge states, and estimated intact protein masses (kDa).

| <b>Precursor (m/z)</b> | <b>Charge State</b> | <b>Estimated Mass</b> |
|------------------------|---------------------|-----------------------|
| 851.40                 | 95                  | 80788.00              |
| 860.50                 | 94                  | 80793.00              |
| 869.70                 | 93                  | 80789.10              |
| 879.10                 | 92                  | 80785.20              |
| 888.70                 | 91                  | 80780.70              |
| 898.50                 | 90                  | 80775.00              |
| 908.60                 | 89                  | 80776.40              |
| 919.00                 | 88                  | 80784.00              |
| 929.50                 | 87                  | 80779.50              |
| 940.20                 | 86                  | 80771.20              |
| 951.20                 | 85                  | 80767.00              |

Supplemental Table S4.

Observed wild-type PBP2<sub>mecA</sub> MS/MS product ions for precursor *m/z* 793.0 (charge state = 102) using HCD dissociation on a Q Exactive HF mass spectrometer.

| Location          | Protein Fragment | Amino Acids | Charge State | <i>m/z</i> (observed) | <i>m/z</i> (theoretical) | $\Delta m$ (ppm) |
|-------------------|------------------|-------------|--------------|-----------------------|--------------------------|------------------|
| <b>N-terminus</b> | b <sub>9</sub>   | 1-9         | 2+           | 540.3544              | 540.3541                 | 0.56             |
|                   | b <sub>10</sub>  | 1-10        | 2+           | 596.8964              | 596.8961                 | 0.50             |
|                   | b <sub>11</sub>  | 1-11        | 3+           | 435.9615              | 435.9612                 | 0.69             |
|                   |                  |             | 2+           | 653.4386              | 653.4382                 | 0.61             |
|                   | b <sub>12</sub>  | 1-12        | 3+           | 473.6561              | 473.6559                 | 0.42             |
|                   |                  |             | 2+           | 709.9804              | 709.9802                 | 0.28             |
|                   | b <sub>13</sub>  | 1-13        | 3+           | 506.6790              | 506.6787                 | 0.59             |
|                   |                  |             | 2+           | 759.5153              | 759.5144                 | 1.18             |
|                   | b <sub>14</sub>  | 1-14        | 3+           | 539.7018              | 539.7015                 | 0.56             |
|                   |                  |             | 2+           | 809.0488              | 809.0486                 | 0.25             |
| b <sub>15</sub>   | 1-15             | 3+          | 572.7245     | 572.7243              | 0.35                     |                  |
|                   |                  | 2+          | 858.5835     | 858.5828              | 0.82                     |                  |
| b <sub>16</sub>   | 1-16             | 3+          | 605.7474     | 605.7471              | 0.50                     |                  |
| <b>C-Terminus</b> | y <sub>142</sub> | 527-668     | 16+          | 1011.0194             | 1011.0178                | 1.58             |
|                   |                  |             | 15+          | 1078.3536             | 1078.3519                | -1.67            |
|                   |                  |             | 14+          | 1155.3075             | 1155.3051                | 2.08             |
|                   | y <sub>139</sub> | 530-668     | 18+          | 881.5087              | 881.5074                 | 1.47             |
|                   |                  |             | 17+          | 933.3032              | 933.3016                 | 1.71             |
|                   |                  |             | 16+          | 991.5708              | 991.5699                 | 0.91             |
|                   |                  |             | 15+          | 1057.6087             | 1057.6075                | 1.13             |
|                   | y <sub>136</sub> | 533-668     | 14+          | 1133.0804             | 1133.0789                | 1.32             |
|                   |                  |             | 16+          | 969.4337              | 969.4308                 | 2.99             |
|                   |                  |             | 15+          | 1033.9942             | 1033.9923                | 1.84             |
|                   | y <sub>134</sub> | 534-668     | 14+          | 1107.7779             | 1107.7770                | 0.81             |
|                   |                  |             | 17+          | 900.6949              | 900.6931                 | 2.00             |
|                   |                  |             | 16+          | 956.9248              | 956.9235                 | 1.36             |
|                   | y <sub>131</sub> | 538-668     | 15+          | 1020.6525             | 1020.6513                | 1.18             |
|                   |                  |             | 14+          | 1093.4859             | 1093.4830                | 2.65             |
|                   |                  |             | 16+          | 936.8547              | 936.8527                 | 2.13             |
|                   | y <sub>130</sub> | 539-668     | 15+          | 999.2422              | 999.2424                 | -0.20            |
|                   |                  |             | 14+          | 1070.5486             | 1070.5449                | 3.46             |
|                   |                  |             | 17+          | 875.1519              | 875.1510                 | 1.03             |
|                   |                  |             | 16+          | 929.7858              | 929.7850                 | 0.86             |
|                   | y <sub>129</sub> | 540-668     | 15+          | -                     | 991.7035                 | -                |
|                   |                  |             | 14+          | 1062.4694             | 1062.4675                | 1.79             |
|                   |                  |             | 17+          | 867.5609              | 867.5602                 | 0.81             |
|                   | y <sub>127</sub> | 542-668     | 16+          | 921.7205              | 921.7198                 | 0.76             |
| 15+               |                  |             | 983.1018     | 983.1006              | 1.22                     |                  |
| 14+               |                  |             | 1053.2520    | 1053.2502             | 1.71                     |                  |
|                   |                  |             | 16+          | 907.4661              | 907.4644                 | 1.87             |
|                   |                  |             | 15+          | 967.8971              | 967.8949                 | 2.27             |
|                   |                  |             | 14+          | 1036.9611             | 1036.9583                | 2.70             |

Note: y<sub>130</sub><sup>15+</sup> was not observed as isotopic pattern overlaps with y<sub>139</sub><sup>16+</sup>

Supplemental Table S5.

Observed PBP2<sub>mecA</sub> peptides following cell lysate fractionation or in-gel digestion of immunopurified PBP2a from ATCC MRSA isolate BAA-44, associated charge states, observed and theoretical m/z values, mass error (ppm), and enzymes used.

| Location | Sequence                                     | Charge State | m/z (obs.) | m/z (theor.) | Error (ppm) | Enzyme |
|----------|----------------------------------------------|--------------|------------|--------------|-------------|--------|
| 2-26     | KIKIVPLILIVVVVGFGIYFYASK                     | 3            | 893.8949   | 893.8920     | 3.2         | Tryp   |
| 27-40    | DKEINNTIDAIEDK                               | 2            | 809.4052   | 809.4019     | 4.1         | Tryp   |
| 34-40    | IDAIEDK                                      | 2            | 402.2109   | 402.2109     | 0           | Prot K |
| 34-44    | IDAIEDKNFKQ                                  | 3            | 440.8985   | 440.8980     | 1.1         | Prot K |
| 48-54    | DSSYISK                                      | 2            | 400.1960   | 400.1953     | 1.7         | Tryp   |
| 55-68    | SDNGEVEMTERPIK                               | 2            | 802.8857   | 802.8829     | 3.5         | Tryp   |
| 69-76    | IYNSLGVK                                     | 2            | 447.2586   | 447.2582     | 0.9         | Tryp   |
| 77-83    | DINIQR                                       | 2            | 437.2257   | 437.2249     | 1.8         | Tryp   |
| 94-100   | RVDAQYK                                      | 2            | 440.2382   | 440.2378     | 1.1         | Tryp   |
| 101-110  | IKTNYGNIDR                                   | 3            | 398.5480   | 398.5473     | 1.8         | Tryp   |
| 103-110  | TNYGNIDR                                     | 2            | 476.7287   | 476.7278     | 1.8         | Tryp   |
| 111-118  | NVQFNFK                                      | 2            | 498.2711   | 498.2691     | 4.0         | Tryp   |
| 125-138  | LDWDHSHVPIPMQK                               | 3            | 546.9510   | 546.9485     | 4.6         | Tryp   |
| 139-148  | DQSIHIENLK                                   | 3            | 399.5486   | 399.5472     | 3.5         | Tryp   |
| 219-229  | KMDEYLSDFAK                                  | 3            | 449.5482   | 449.5481     | 0.2         | Tryp   |
| 230-241  | KFHLTTNETESR                                 | 3            | 488.2474   | 488.2477     | -0.6        | Tryp   |
| 231-241  | FHLTTNETESR                                  | 3            | 445.5504   | 445.5494     | 2.2         | Tryp   |
| 248-265  | ATSHLLGVVGPINSEELK                           | 3            | 643.3433   | 643.3423     | 1.6         | Tryp   |
| 271-280  | GYKDDAVIGK                                   | 2            | 533.2842   | 533.2824     | 3.4         | Tryp   |
| 290-298  | KLQHEDGYR                                    | 3            | 382.5280   | 382.5281     | -0.3        | Tryp   |
| 293-300  | HEDGYRVT                                     | 2            | 488.7281   | 488.7278     | 0.6         | Prot K |
| 299-316  | VTIVDDNSNTIAHTLIEK                           | 3            | 661.6860   | 661.6846     | 2.1         | Tryp   |
| 301-311  | IVDDNSNTIAH                                  | 2            | 599.7888   | 599.7886     | 0.3         | Prot K |
| 320-331  | DGKDIQLTIDAK                                 | 3            | 439.5739   | 439.5734     | 1.1         | Tryp   |
| 323-331  | DIQLTIDAK                                    | 2            | 508.7851   | 508.7848     | 0.6         | Tryp   |
| 342-382  | NDYGSQTAIHPQTGELLALVSTPSYDVYPFMYGMSNEEYNK    | 3            | 1521.3666  | 1521.3613    | 3.5         | Tryp   |
| 376-383  | SNEEYK                                       | 2            | 498.7361   | 498.7353     | 1.6         | Prot K |
| 383-394  | LTEDKKEPLLNK                                 | 3            | 476.6098   | 476.6083     | 3.2         | Tryp   |
| 395-406  | FQITTSFGSTQK                                 | 2            | 647.8361   | 647.8355     | 0.9         | Tryp   |
| 407-417  | ILTAMIGLNNK                                  | 2            | 594.3447   | 594.3445     | 0.3         | Tryp   |
| 407-417  | ILTAmIGLNNK                                  | 2            | 602.3432   | 602.3419     | 2.2         | Tryp   |
| 418-426  | TLDDKTSYK                                    | 3            | 357.5179   | 357.5170     | 2.5         | Tryp   |
| 435-445  | DKSWGGINVTR                                  | 3            | 428.2113   | 428.2107     | 1.4         | Tryp   |
| 446-456  | YEVVNGNIDLK                                  | 2            | 632.3328   | 632.3326     | 0.3         | Tryp   |
| 457-469  | QAISSDNIFAR                                  | 2            | 749.3720   | 749.3903     | 2.3         | Tryp   |
| 470-477  | VALELGSK                                     | 2            | 408.7458   | 408.7449     | 2.2         | Tryp   |
| 485-506  | KLGVGEDIPSDYPFYNAQISNK                       | 3            | 819.0778   | 819.0762     | 1.9         | Tryp   |
| 486-506  | LGVGEDIPSDYPFYNAQISNK                        | 2            | 776.2796   | 776.3779     | 2.2         | Tryp   |
| 505-513  | NKNLDNEIL                                    | 2            | 536.7859   | 536.7853     | 1.1         | Prot K |
| 507-551  | NLDNEILLADSGYGQGEILINPVQILSIYSALENNGNINAPHLK | 3            | 1620.8566  | 1620.8521    | 2.8         | Tryp   |
| 582-589  | THKEDIYR                                     | 3            | 354.5178   | 354.5173     | 1.4         | Tryp   |
| 582-591  | THKEDIYRSY                                   | 3            | 404.1998   | 404.1999     | -0.2        | Prot K |
| 583-591  | HKEDIYRSY                                    | 3            | 437.8832   | 437.8824     | 1.8         | Prot K |
| 590-597  | SYANLIGK                                     | 2            | 433.2442   | 433.2425     | 3.9         | Tryp   |
| 598-604  | SGTAEK                                       | 2            | 353.1923   | 353.1925     | -0.6        | Tryp   |
| 613-634  | QIGWFISYDKDNPmMMAINVK                        | 3            | 877.7516   | 877.7517     | -0.1        | Tryp   |
| 618-628  | ISYDKDNPMM                                   | 2            | 664.2878   | 664.2865     | 2.0         | Prot K |
| 620-628  | YDKDNPMM                                     | 2            | 564.2294   | 564.2284     | 2.0         | Prot K |
| 621-628  | DKDNPMM                                      | 2            | 482.6972   | 482.6968     | 0.8         | Prot K |
| 640-647  | GMASYNK                                      | 2            | 421.1970   | 421.1973     | -0.7        | Tryp   |
| 652-662  | VYDELYENGNK                                  | 2            | 672.3105   | 672.3093     | 1.8         | Tryp   |
| 663-668  | KYDIDE                                       | 2            | 391.6818   | 391.6820     | -0.5        | Tryp   |

Supplemental Table S6.

List of quality control and clinical MSSA and MRSA isolates, associated characteristics, and sources.

| Isolate               | SCC <i>mec</i> | Resistance Gene | PFGE Type | Source                                      |
|-----------------------|----------------|-----------------|-----------|---------------------------------------------|
| 12600                 | -              | -               | n/a       | American Type Culture Collection, USA       |
| 25923                 | -              | -               | n/a       | American Type Culture Collection, USA       |
| 29737                 | -              | -               | n/a       | American Type Culture Collection, USA       |
| BAA-44                | Type I         | <i>mecA</i>     | Iberian   | American Type Culture Collection, USA       |
| BAA-41                | Type II        | <i>mecA</i>     | USA 100   | American Type Culture Collection, USA       |
| 33592                 | Type III       | <i>mecA</i>     | ST239     | American Type Culture Collection, USA       |
| BAA-1683              | Type IV a      | <i>mecA</i>     | USA 400   | American Type Culture Collection, USA       |
| BAA-2094              | Type V         | <i>mecA</i>     | WA-MRSA   | American Type Culture Collection, USA       |
| BAA-42                | Type VI        | <i>mecA</i>     | USA 800   | American Type Culture Collection, USA       |
| BAA-2313              | Type XI        | <i>mecC</i>     | CC130     | American Type Culture Collection, USA       |
| BAA-1761              | Type II        | <i>mecA</i>     | USA 100   | American Type Culture Collection, USA       |
| BAA-1720              | Type II        | <i>mecA</i>     | USA 200   | American Type Culture Collection, USA       |
| BAA-1717              | Type IV a      | <i>mecA</i>     | USA 300   | American Type Culture Collection, USA       |
| BAA-1707              | Type IV        | <i>mecA</i>     | USA 400   | American Type Culture Collection, USA       |
| BAA-1763              | Type IV        | <i>mecA</i>     | USA 500   | American Type Culture Collection, USA       |
| BAA-1754              | Type IV        | <i>mecA</i>     | USA 600   | American Type Culture Collection, USA       |
| BAA-1766              | Type V         | <i>mecA</i>     | USA 700   | American Type Culture Collection, USA       |
| BAA-1768              | Type IV        | <i>mecA</i>     | USA 800   | American Type Culture Collection, USA       |
| BAA-1747              | Type IV        | <i>mecA</i>     | USA 1000  | American Type Culture Collection, USA       |
| BAA-1764              | Type IV        | <i>mecA</i>     | USA 1100  | American Type Culture Collection, USA       |
| BAA-2312              | Type XI        | <i>mecC</i>     | n/a       | American Type Culture Collection, USA       |
| BAA-42                | Type IV        | <i>mecA</i>     | USA 800   | American Type Culture Collection, USA       |
| 33591                 | Type III       | <i>mecA</i>     | n/a       | American Type Culture Collection, USA       |
| BAA-38                | Type I         | <i>mecA</i>     | n/a       | American Type Culture Collection, USA       |
| BAA-1750              | Type II        | <i>mecA</i>     | USA 200   | American Type Culture Collection, USA       |
| BAA-1689              | Type IV        | <i>mecA</i>     | USA 500   | American Type Culture Collection, USA       |
| 43300                 | Type II        | <i>mecA</i>     | n/a       | American Type Culture Collection, USA       |
| BAA-1708              | Type II        | <i>mecA</i>     | n/a       | American Type Culture Collection, USA       |
| MSSA Clin. Isolate 1  | -              | -               | n/a       | St. George's University Hospital, London UK |
| MRSA Clin. Isolate 1  | Type IV a      | <i>mecA</i>     | n/a       | Univ. Hospital Ramón y Cajal, Madrid Spain  |
| MRSA Clin. Isolate 2  | n/a            | <i>mecA</i>     | n/a       | Univ. Hospital Ramón y Cajal, Madrid Spain  |
| MRSA Clin. Isolate 3  | Type IV a      | <i>mecA</i>     | n/a       | Univ. Hospital Ramón y Cajal, Madrid Spain  |
| MRSA Clin. Isolate 4  | n/a            | <i>mecA</i>     | n/a       | Univ. Hospital Ramón y Cajal, Madrid Spain  |
| MRSA Clin. Isolate 5  | n/a            | <i>mecA</i>     | n/a       | Univ. Hospital Ramón y Cajal, Madrid Spain  |
| MRSA Clin. Isolate 6  | Type IV a      | <i>mecA</i>     | n/a       | Univ. Hospital Ramón y Cajal, Madrid Spain  |
| MRSA Clin. Isolate 7  | n/a            | <i>mecA</i>     | n/a       | Univ. Hospital Ramón y Cajal, Madrid Spain  |
| MRSA Clin. Isolate 8  | n/a            | <i>mecA</i>     | n/a       | Univ. Hospital Ramón y Cajal, Madrid Spain  |
| MRSA Clin. Isolate 9  | Type IV c      | <i>mecA</i>     | n/a       | Univ. Hospital Ramón y Cajal, Madrid Spain  |
| MRSA Clin. Isolate 10 | Type IV c      | <i>mecA</i>     | n/a       | Univ. Hospital Ramón y Cajal, Madrid Spain  |
| MRSA Clin. Isolate 11 | n/a            | <i>mecA</i>     | n/a       | Univ. Hospital Ramón y Cajal, Madrid Spain  |
| MRSA Clin. Isolate 12 | Type IV a      | <i>mecA</i>     | n/a       | Univ. Hospital Ramón y Cajal, Madrid Spain  |

n/a – not available

Supplemental Table S7.

N-terminal sequences from four different PBP2a variants, accession numbers, and species.

| <b>PBP2a Variant</b>  | <b>UniProt Accession Number</b> | <b>Species</b>                  | <b>N-terminal Sequence</b><br>(15 amino acids) |
|-----------------------|---------------------------------|---------------------------------|------------------------------------------------|
| PBP2a <sub>mecA</sub> | Q53707                          | <i>Staphylococcus aureus</i>    | MKKIKIVPLILIVVV...                             |
| PBP2a <sub>mecB</sub> | A0A4Y1NMT9                      | <i>Macrococcus canis</i>        | MKNKALAILIICICL...                             |
| PBP2a <sub>mecC</sub> | F4NA57                          | <i>Staphylococcus aureus</i>    | MKKIYISVLVLLIM...                              |
| PBP2a <sub>mecD</sub> | A0A1S7BGS4                      | <i>Macrococcus caseolyticus</i> | MKNIKVKILIVCSLC...                             |



Supplemental Figure S1.

Intact recombinant His<sub>6</sub>-PBP2a<sub>mecA</sub> MS/MS spectrum acquired with static infusion, isolation of precursor ion at  $m/z = 742.5$ , isolation window of 3 Th.

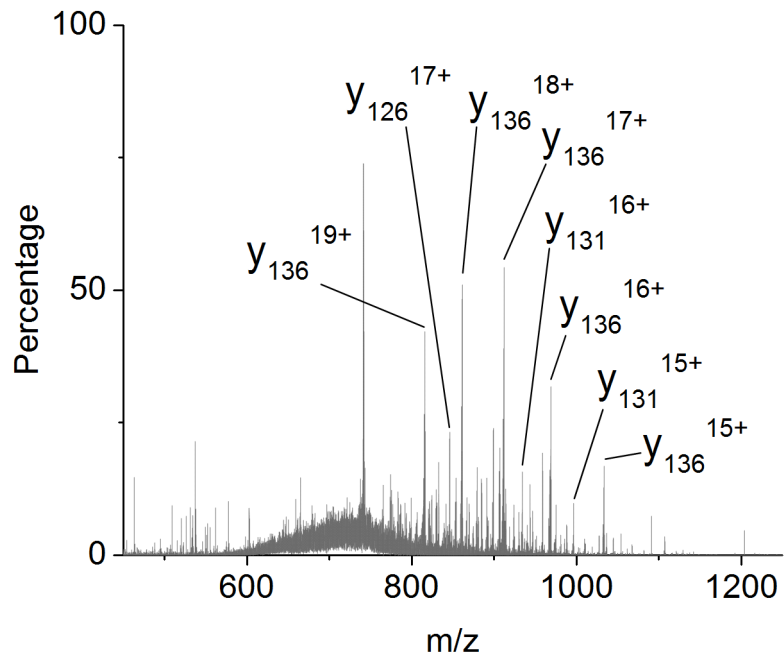

Supplemental Figure S2.

Detection of recombinant SDS-PAGE separated His<sub>6</sub>-PBP2a<sub>mecA</sub> (1 μg) and immunopurified PBP2a<sub>mecA</sub> from ATCC MRSA isolate BAA-44 with ProQ Emerald glycoprotein stain, and total protein using Sypro Ruby total protein stain or silver stain (left side). Detection of immunopurified protein components before and after treatment with deglycosylation mix (right side). Original gel images are displayed on the next page.

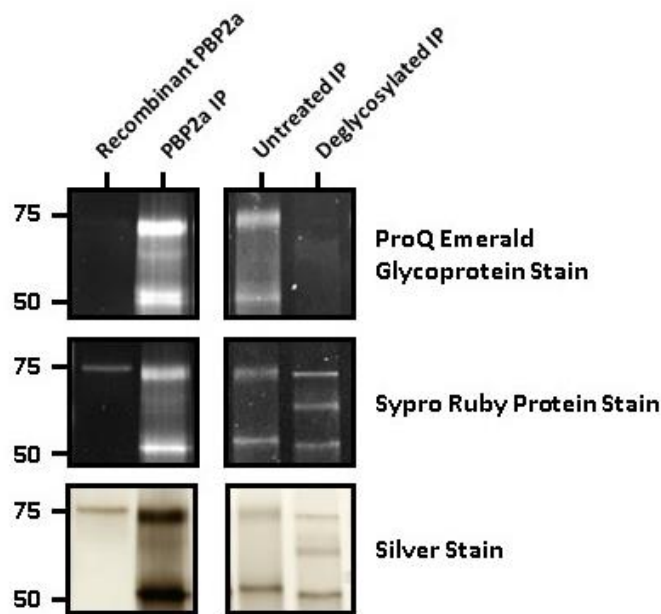

Supplemental Figure S2. cont.

Below are the original gel images for the previous figure. Red boxes highlight those areas of the gel that have been selected for display.

20160428\_Pro-Q Emerald 300 Glycoprotein stain

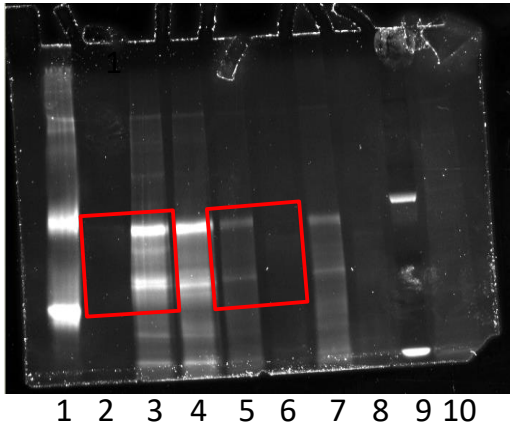

1. CandyCane std, 0.25µg of each protein
  2. rPBP2a, 0.25µg
  3. PBP2a IP 3.4.2016, 10µl
  4. PBP2a IP 3.18.2016, 10µl
  5. IP - untreated #2, 10µl
  6. IP + treated #1, 10µl
  7. IP - 3.22.2016, 10µl
  8. IP + MIX 3.22.2016, 10µl
  9. BioRad Precision plus std, 5µl
  10. STA2; 25.11.2015, 10µl (Herdis)
- from Jason

20160429\_Sypro Ruby Protein stain (stains all proteins)

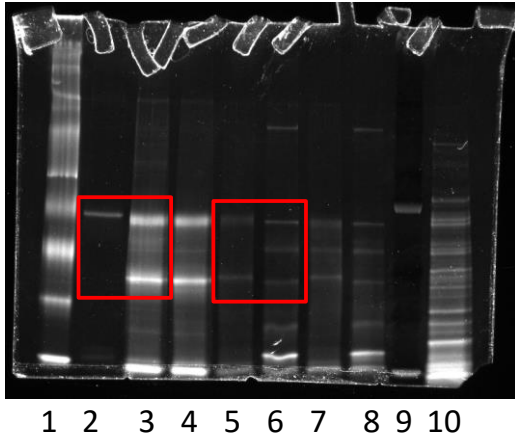

20160429\_Silver stain

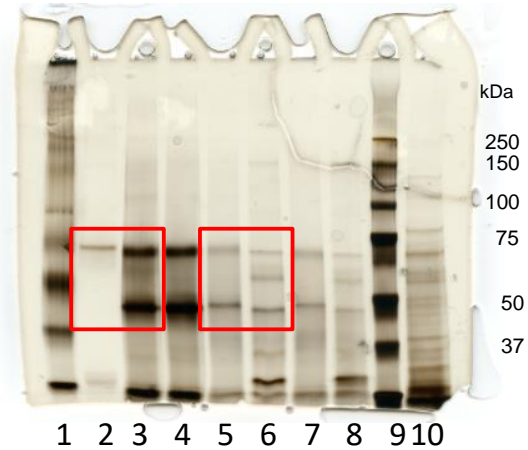

Supplemental Figure S3.1

**KIKIVPLILIVVVVGFGIYFYASK**

Location: aa 2-26

Precursor Charge State: 3

Theoretical Monoisotopic: 893.8920 *m/z*

Mass Error: 3.2 ppm

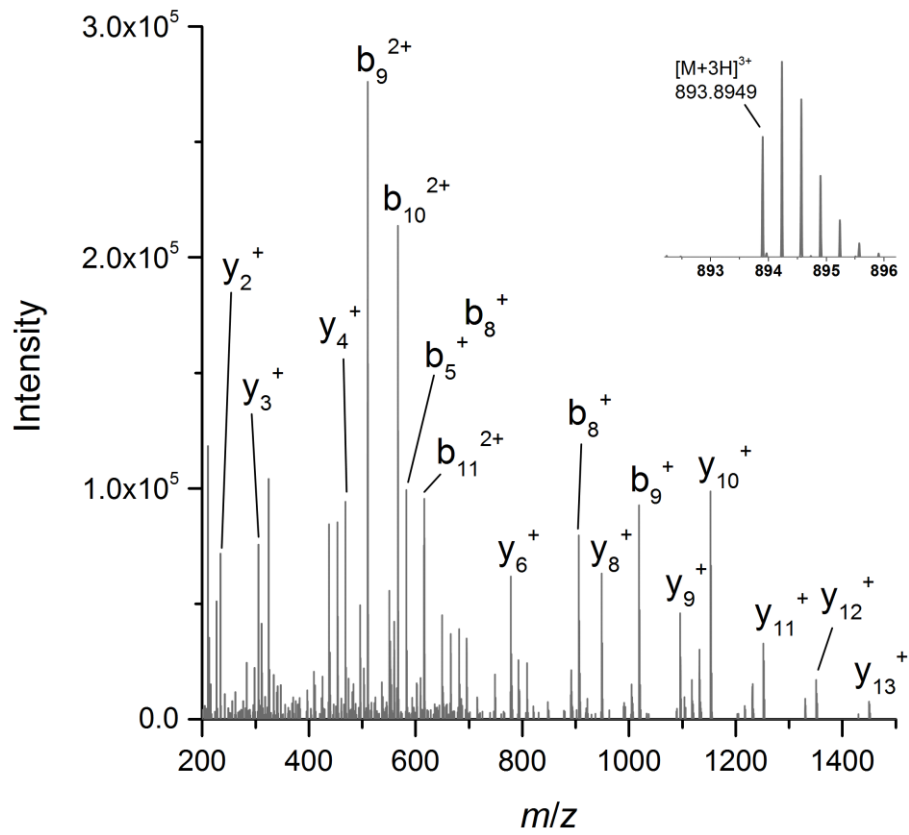

Supplemental Figure S3.2

# DKEINTDAIEDK

Location: aa 27-40

Precursor Charge State: 2

Theoretical Monoisotopic: 809.4019  $m/z$

Mass Error: 4.1 ppm

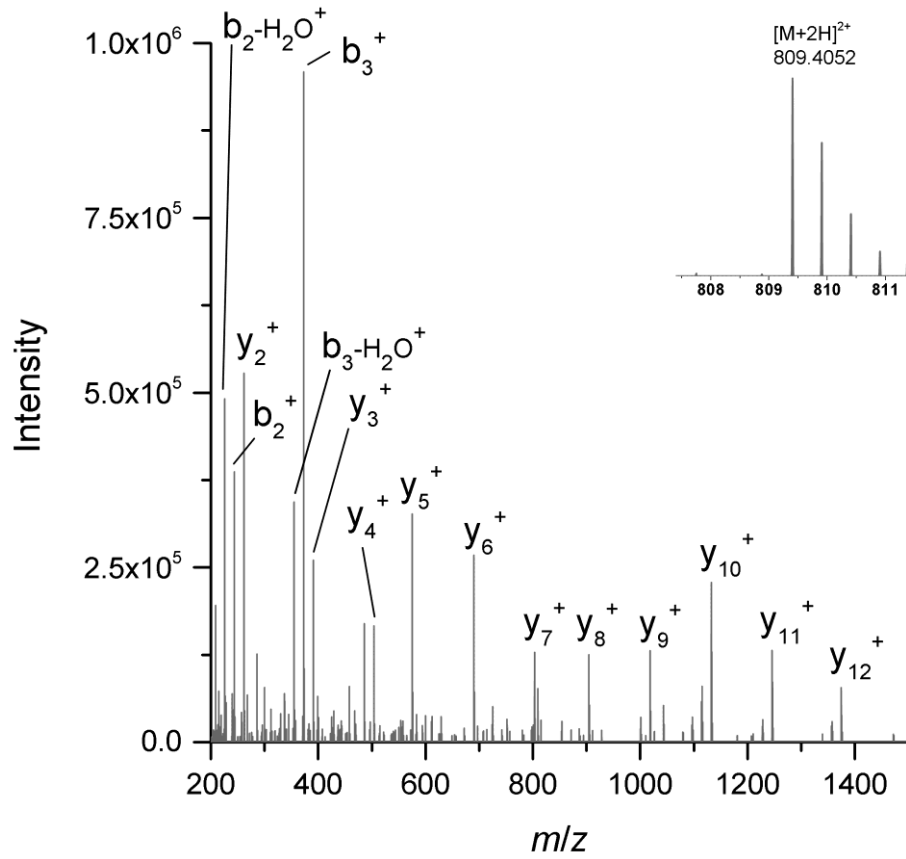

Supplemental Figure S3.3

## IDAIEDK (Proteinase K)

Location: aa 34-40

Precursor Charge State: 2

Theoretical Monoisotopic: 402.2109  $m/z$

Mass Error: 0 ppm

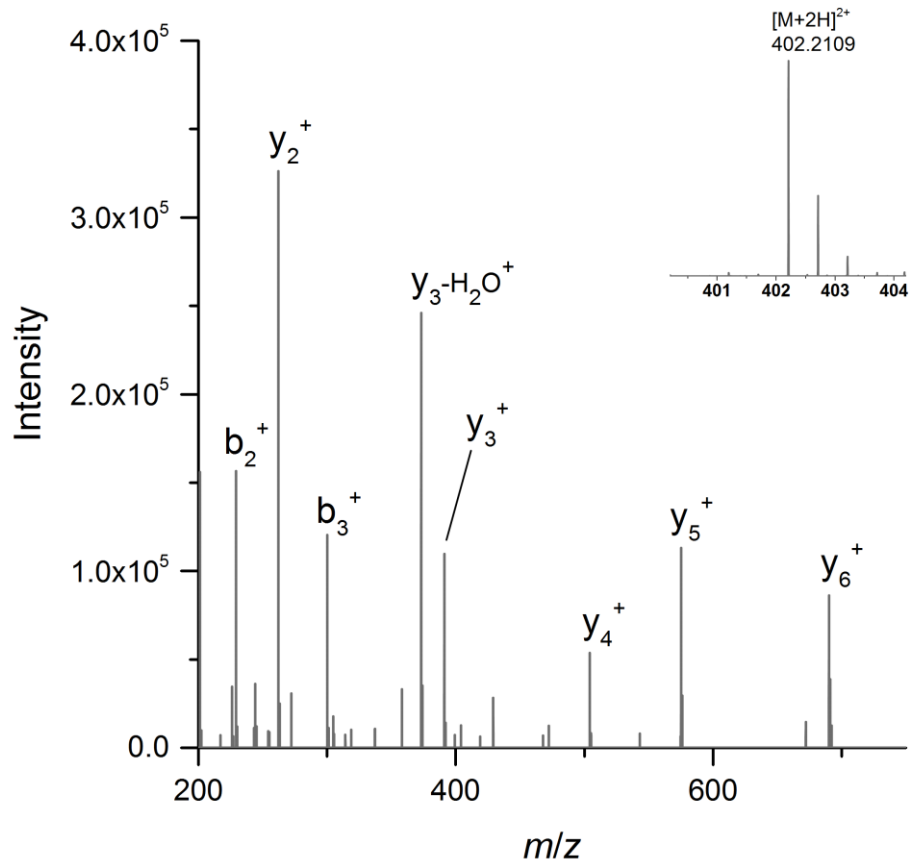

Supplemental Figure S3.4

### IDAIEDKNFKQ (Proteinase K)

Location: aa 34-44

Precursor Charge State: 3

Theoretical Monoisotopic: 440.8980  $m/z$

Mass Error: 1.1 ppm

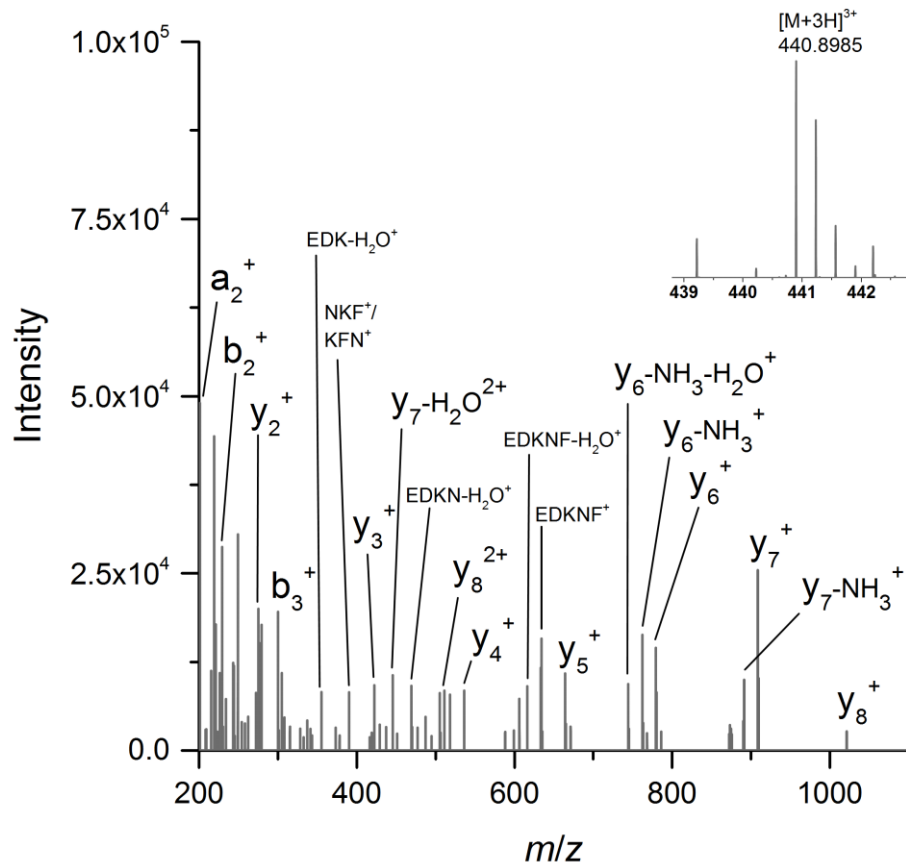

Supplemental Figure S3.5

## DSSYISK

Location: aa 48-54

Precursor Charge State: 2

Theoretical Monoisotopic: 400.1953  $m/z$

Mass Error: 1.7 ppm

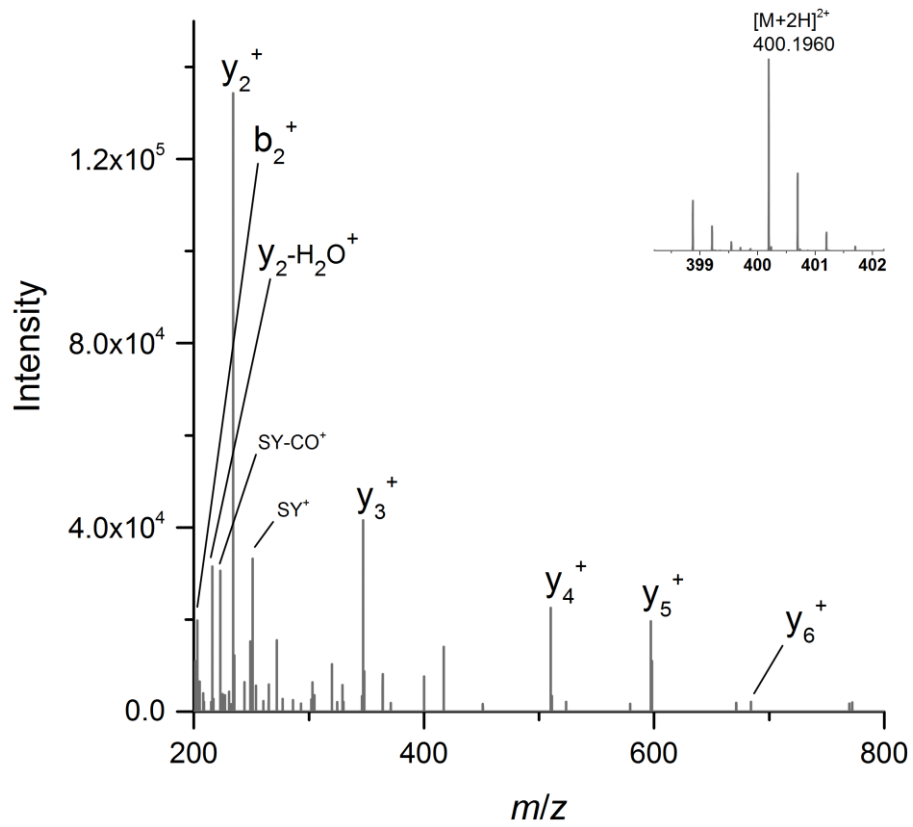



Supplemental Figure S3.6

# SDNGEVEMTERPIK

Location: aa 55-68

Precursor Charge State: 2

Theoretical Monoisotopic: 802.8829  $m/z$

Mass Error: 3.5 ppm

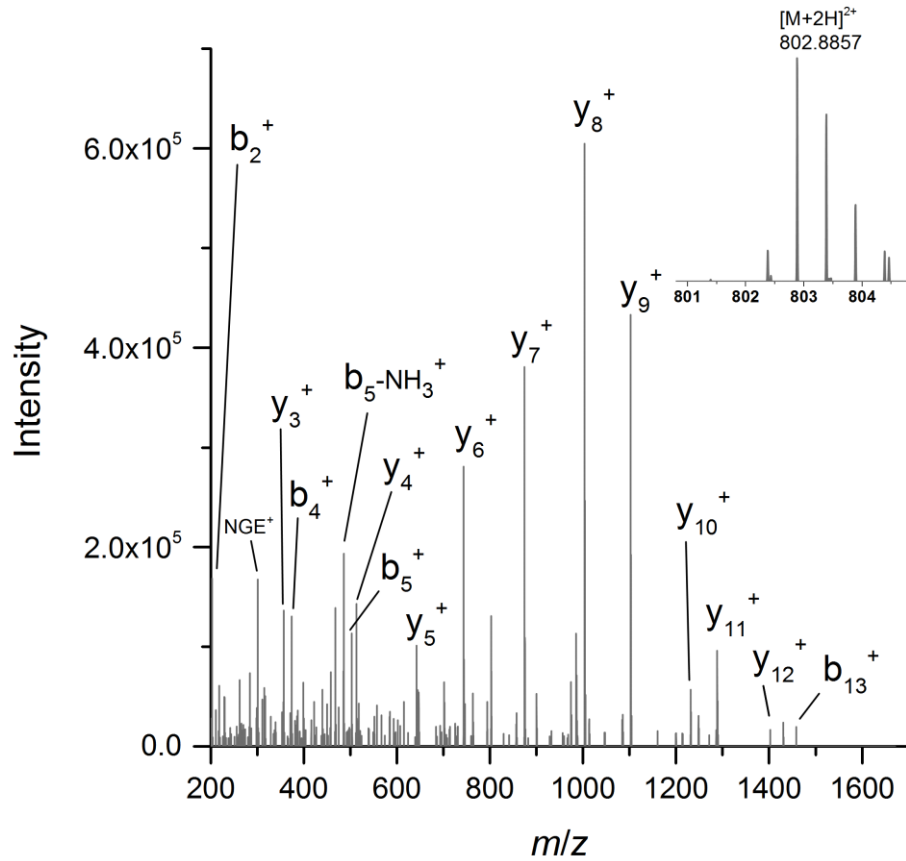

Supplemental Figure S3.7

# IYNSLGVK

Location: aa 69-76

Precursor Charge State: 2

Theoretical Monoisotopic: 447.2582  $m/z$

Mass Error: 0.9 ppm

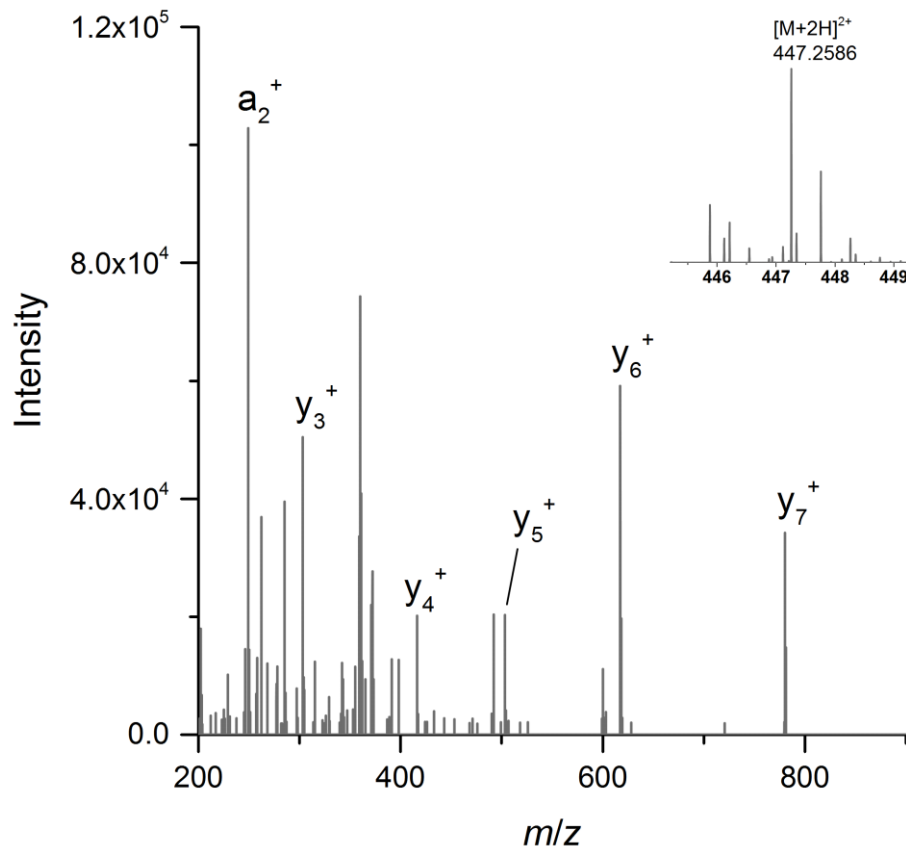

Supplemental Figure S3.8

## DINIQR

Location: aa 77-83

Precursor Charge State: 2

Theoretical Monoisotopic: 437.2249  $m/z$

Mass Error: 1.8 ppm

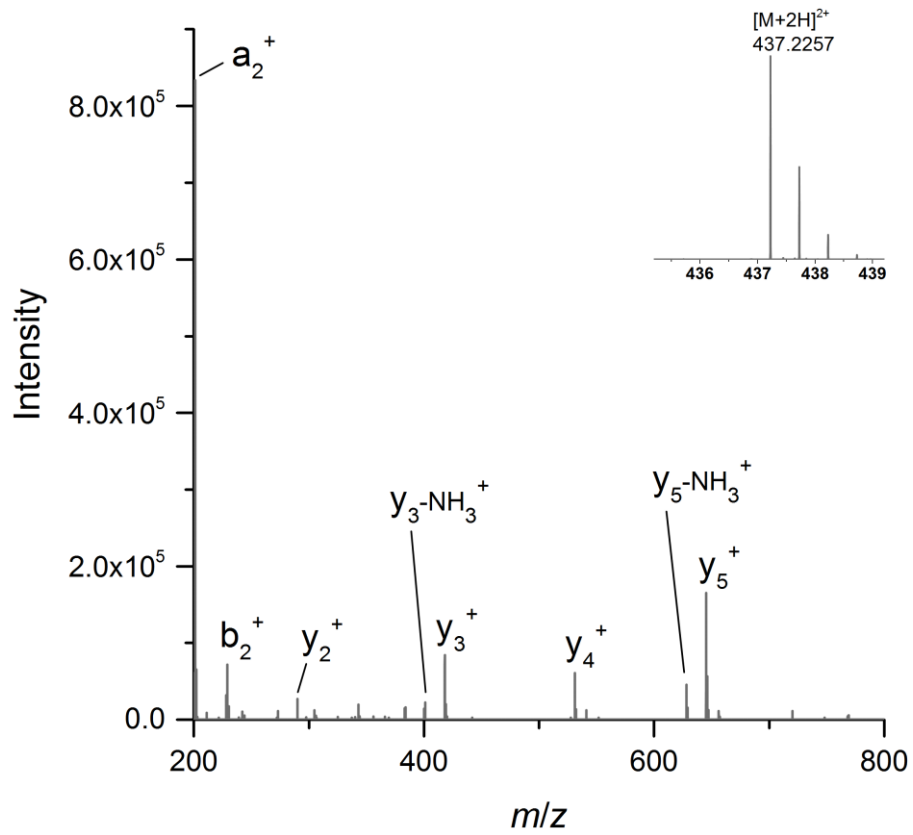

Supplemental Figure S3.9

# **RVDAQYK**

Location: aa 94-100

Precursor Charge State: 2

Theoretical Monoisotopic: 440.2378  $m/z$

Mass Error: 1.1 ppm

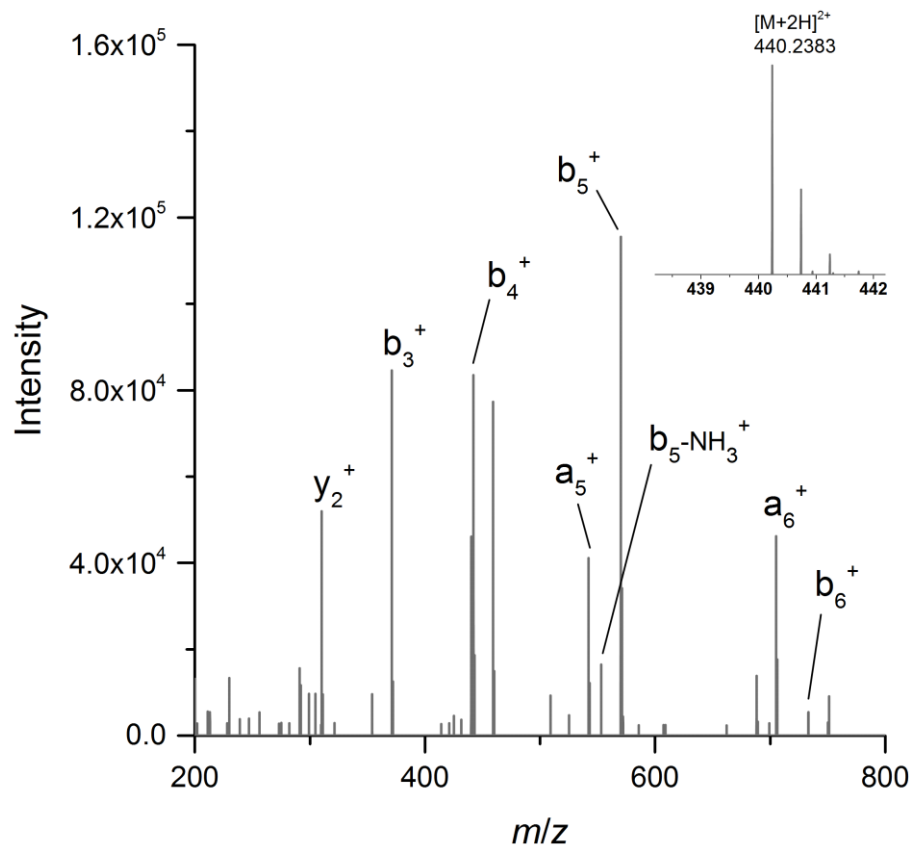

Supplemental Figure S3.10

# IKTNYGNIDR

Location: aa 101-110

Precursor Charge State: 3

Theoretical Monoisotopic: 398.5473  $m/z$

Mass Error: 1.8 ppm

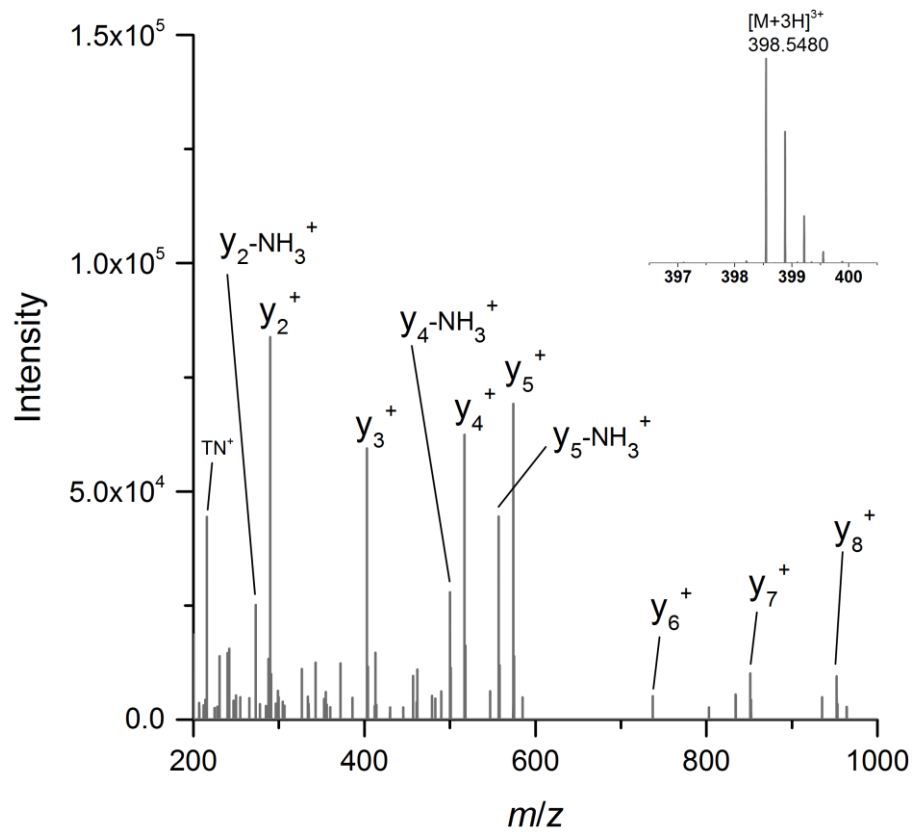

Supplemental Figure S3.11

## TNYGNIDR

Location: aa 103-110

Precursor Charge State: 2

Theoretical Monoisotopic: 476.7278  $m/z$

Mass Error: 1.8 ppm

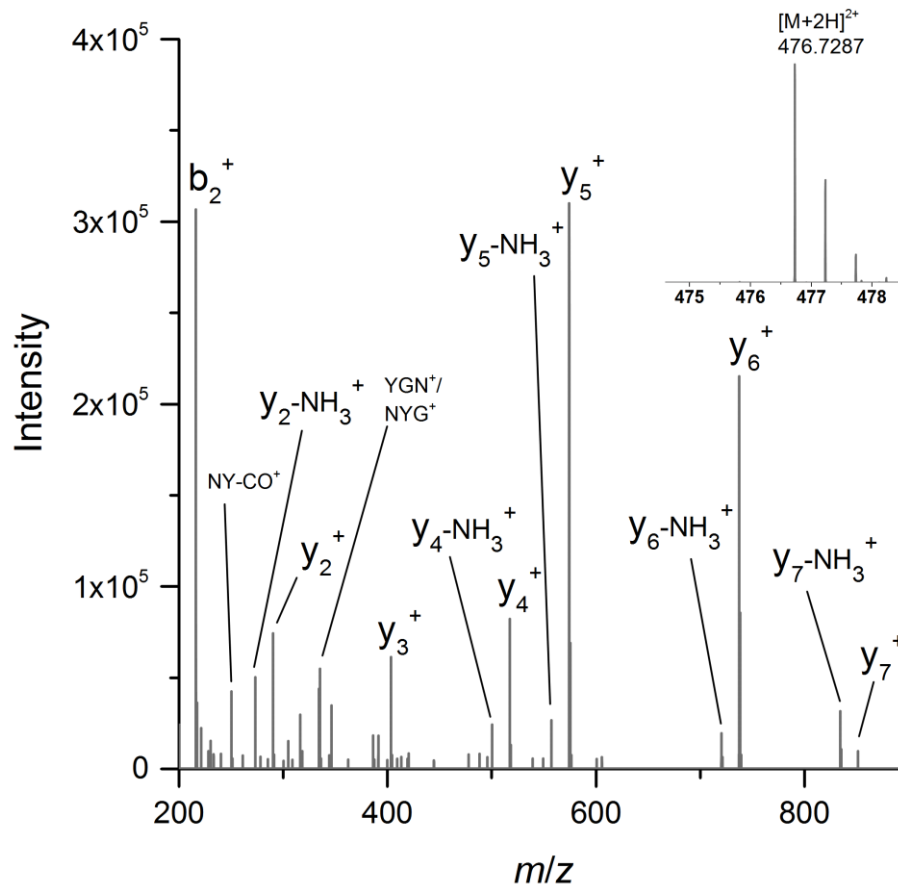

Supplemental Figure S3.12

# NVQFNFK

Location: aa 111-118

Precursor Charge State: 2

Theoretical Monoisotopic: 498.2691  $m/z$

Mass Error: 4.0 ppm

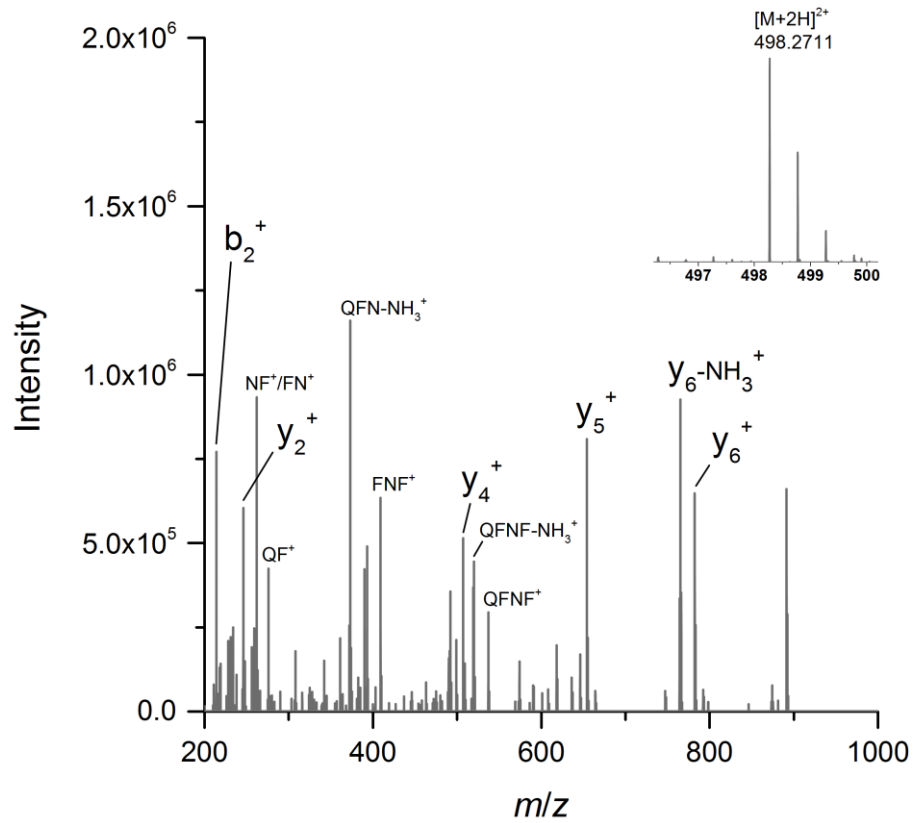

Supplemental Figure S3.13

**LDWDHSVIIPGMQK**

Location: aa 125-138

Precursor Charge State: 3

Theoretical Monoisotopic: 546.9485  $m/z$

Mass Error: 4.6 ppm

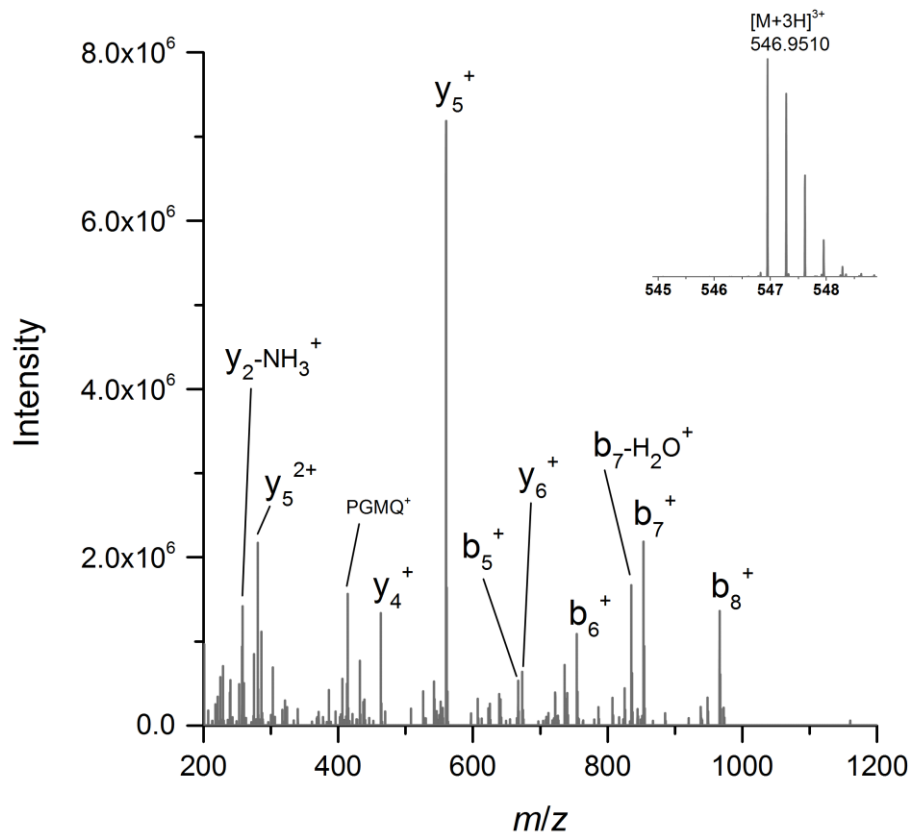



Supplemental Figure S3.14

# DQSIHIENLK

Location: aa 139-148

Precursor Charge State: 3

Theoretical Monoisotopic: 399.5472  $m/z$

Mass Error: 3.5 ppm

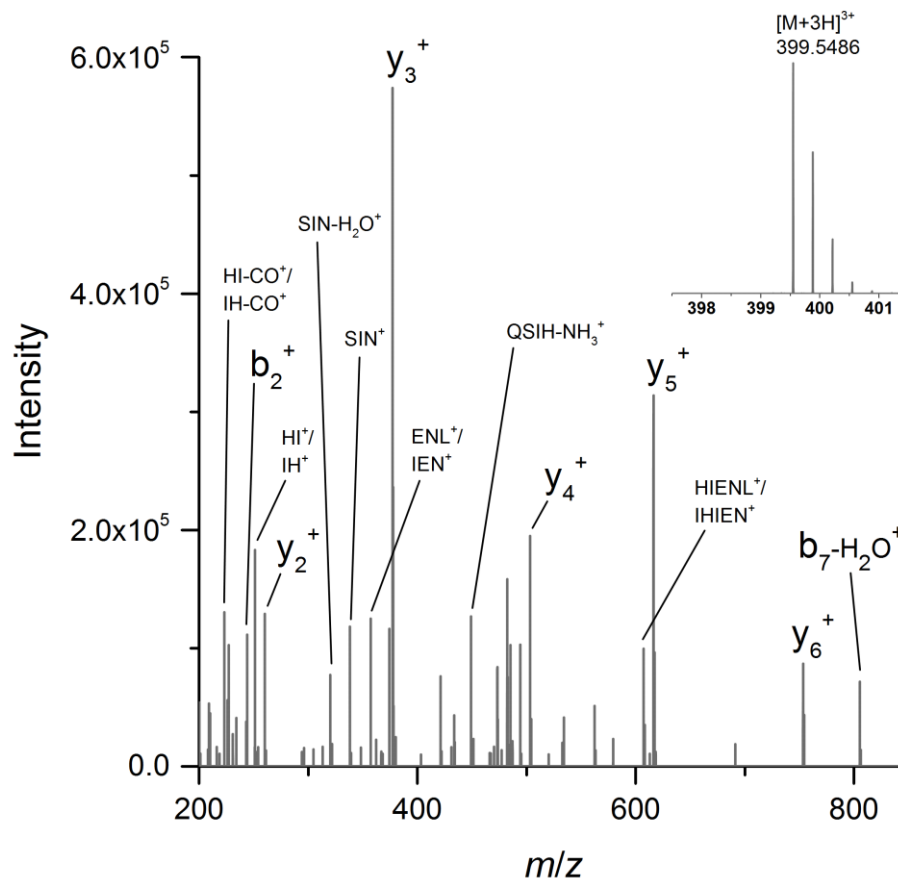

Supplemental Figure S3.15

**KMDEYLSDFAK**

Location: aa 219-229

Precursor Charge State: 3

Theoretical Monoisotopic: 449.5481  $m/z$

Mass Error: 0.2 ppm

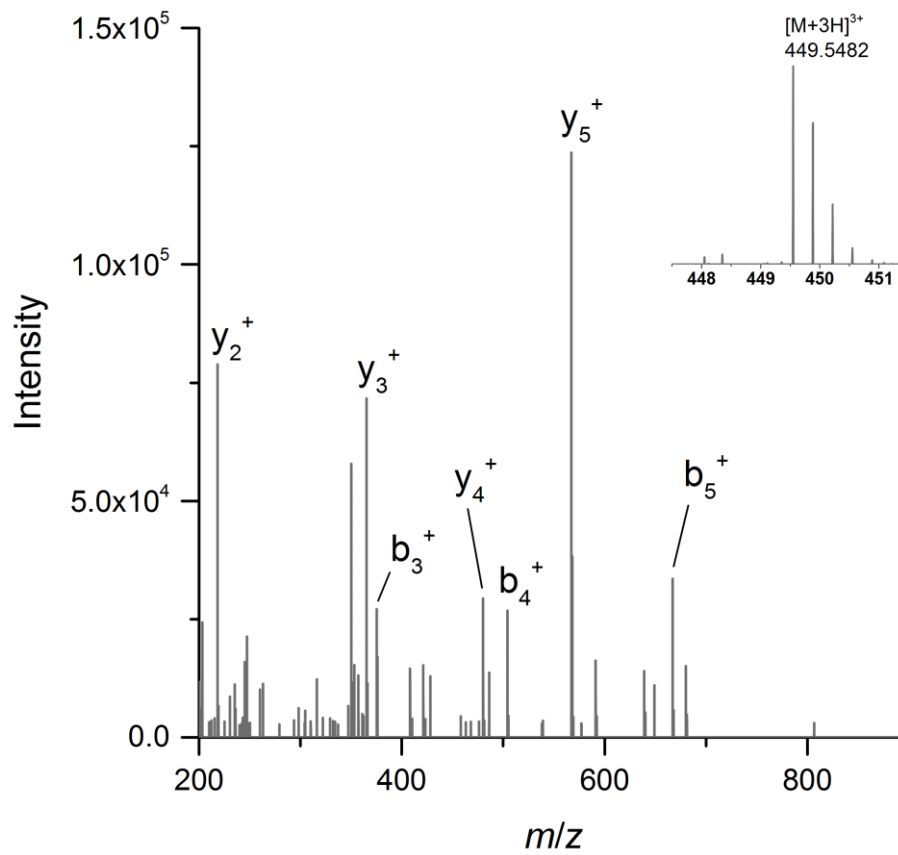

Supplemental Figure S3.16

# KFHLTTNETESR

Location: aa 230-241

Precursor Charge State: 3

Theoretical Monoisotopic: 488.2477  $m/z$

Mass Error: -0.2 ppm

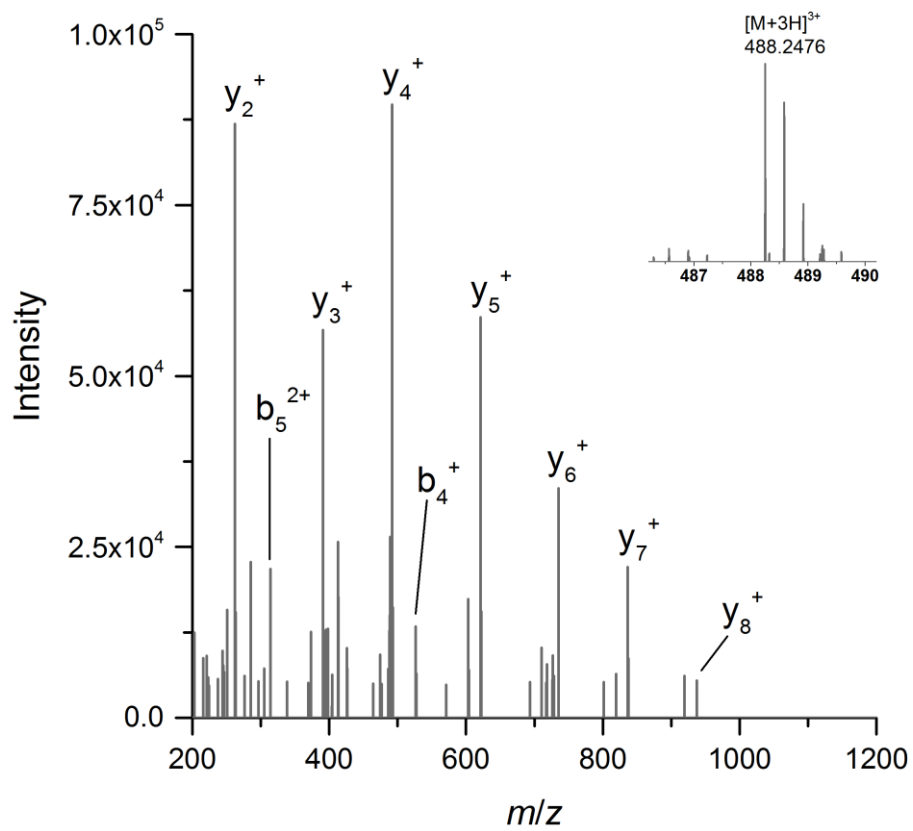

Supplemental Figure S3.17

# FHLTTNETESR

Location: aa 231-241

Precursor Charge State: 3

Theoretical Monoisotopic: 445.5494  $m/z$

Mass Error: 2.2 ppm

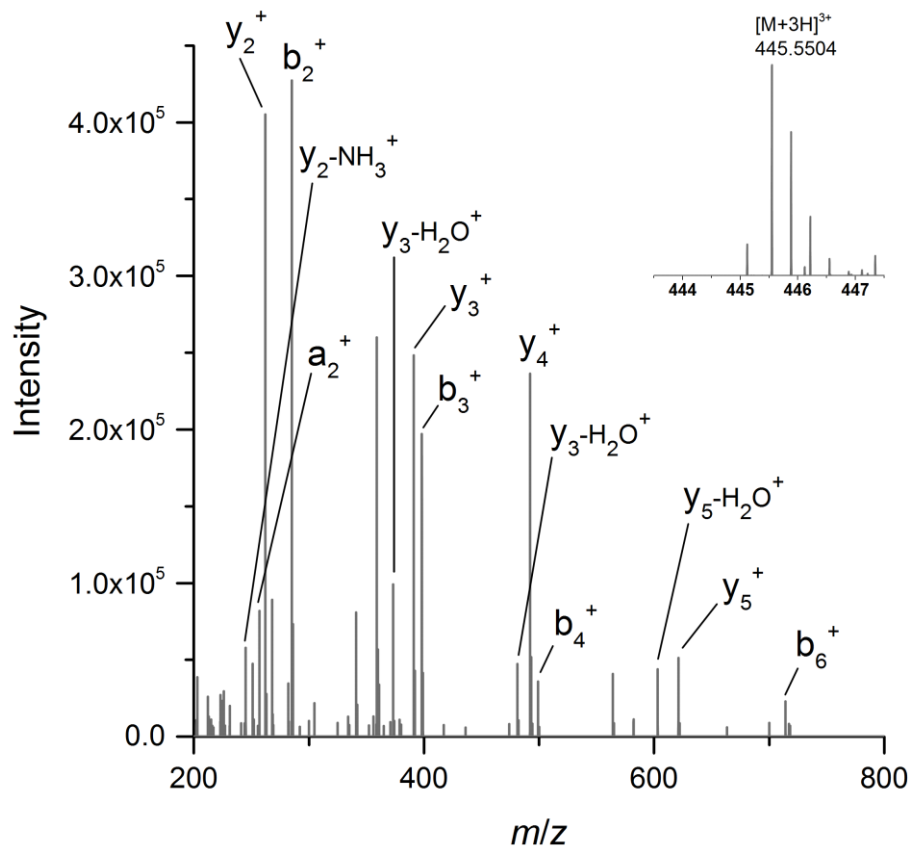

Supplemental Figure S3.18

# ATSHLLGYVGPINSEELK

Location: aa 248-265

Precursor Charge State: 3

Theoretical Monoisotopic: 643.3423  $m/z$

Mass Error: 1.6 ppm

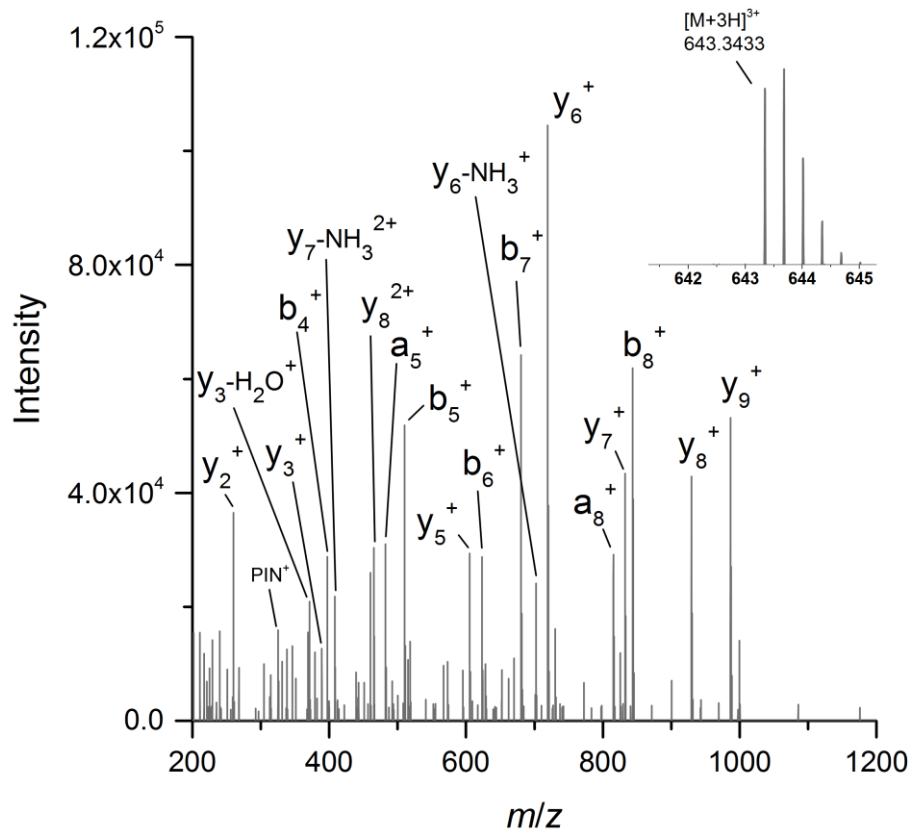

Supplemental Figure S3.19

# GYKDDAVIGK

Location: aa 271-280

Precursor Charge State: 2

Theoretical Monoisotopic: 533.2824  $m/z$

Mass Error: 3.4 ppm

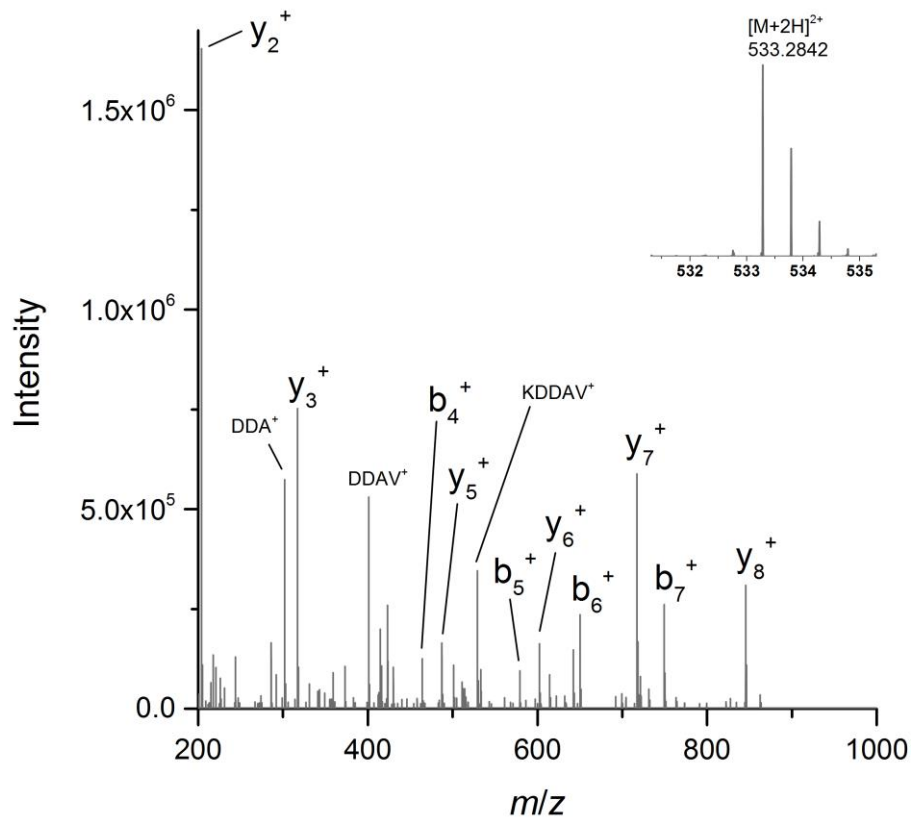

Supplemental Figure S3.20

# KLQHEDGYR

Location: aa 290-298

Precursor Charge State: 3

Theoretical Monoisotopic: 382.5281  $m/z$

Mass Error: -0.3 ppm

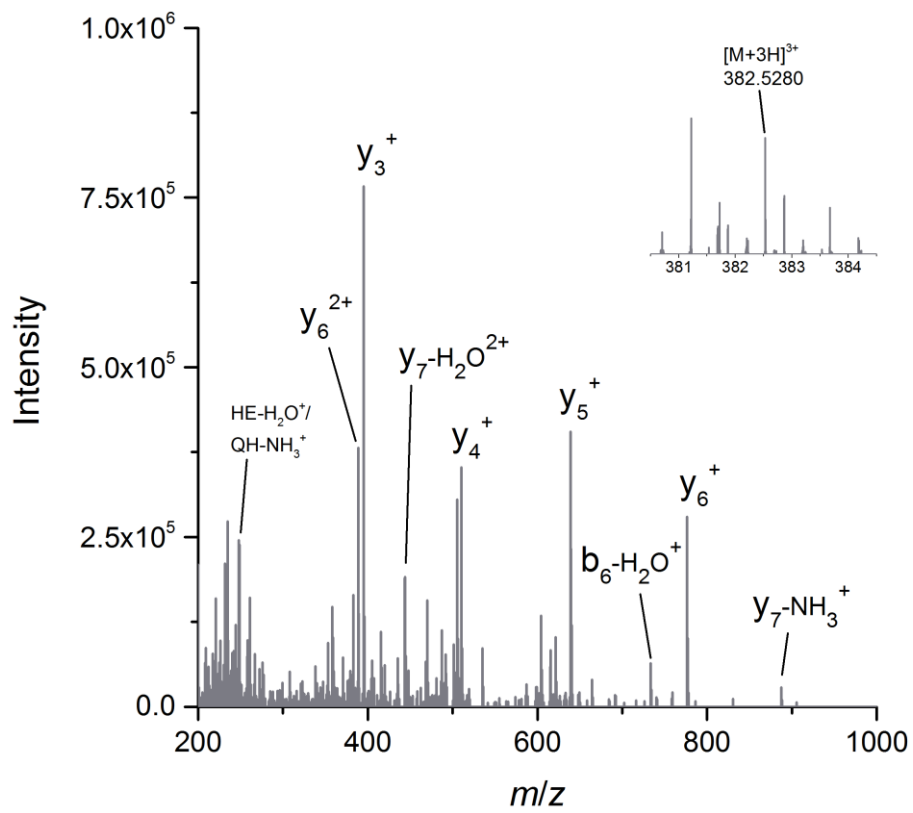

Supplemental Figure S3.21

## HEDGYRVT (Proteinase K)

Location: aa 293-300

Precursor Charge State: 2

Theoretical Monoisotopic: 488.7278  $m/z$

Mass Error: 0.6 ppm

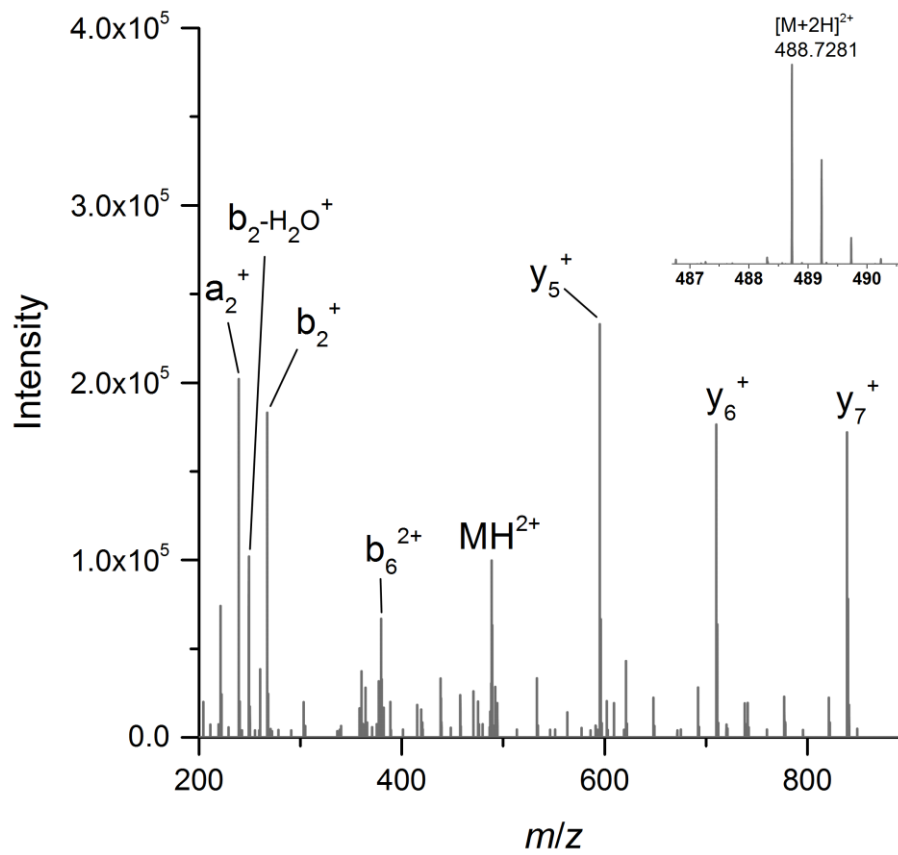



Supplemental Figure S3.22

# VTIVDDNSNTIAHTLIEK

Location: aa 299-316

Precursor Charge State: 3

Theoretical Monoisotopic: 661.6846  $m/z$

Mass Error: 2.1 ppm

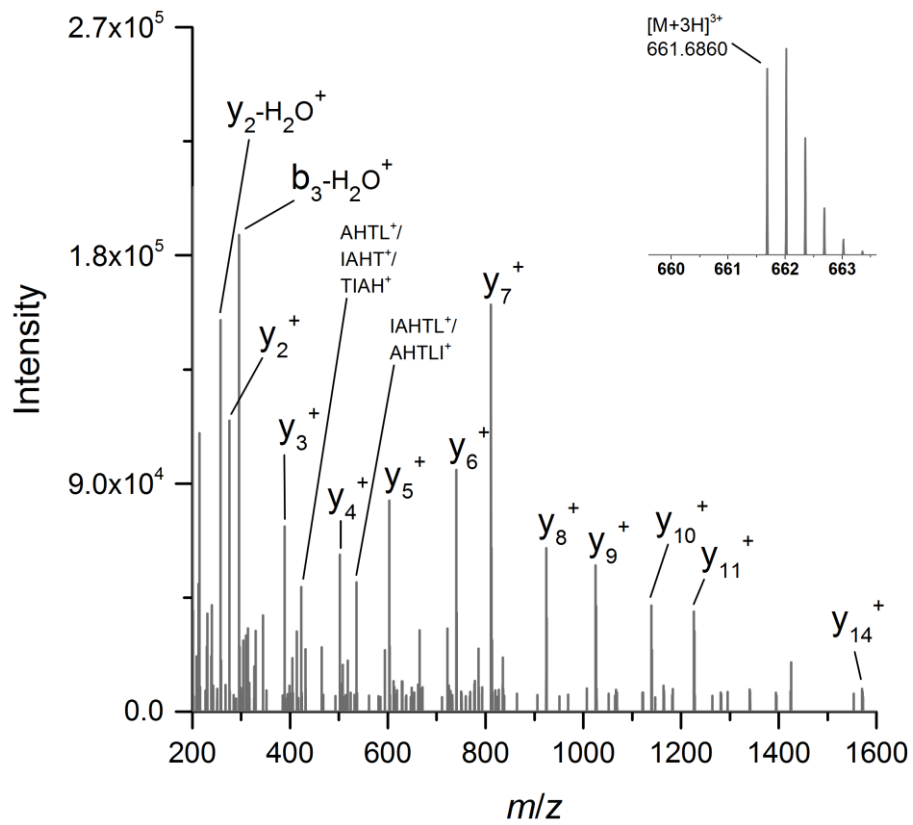

Supplemental Figure S3.23

### IVDDNSNTIAH (Proteinase K)

Location: aa 301-311

Precursor Charge State: 2

Theoretical Monoisotopic: 599.7886  $m/z$

Mass Error: 0.3 ppm

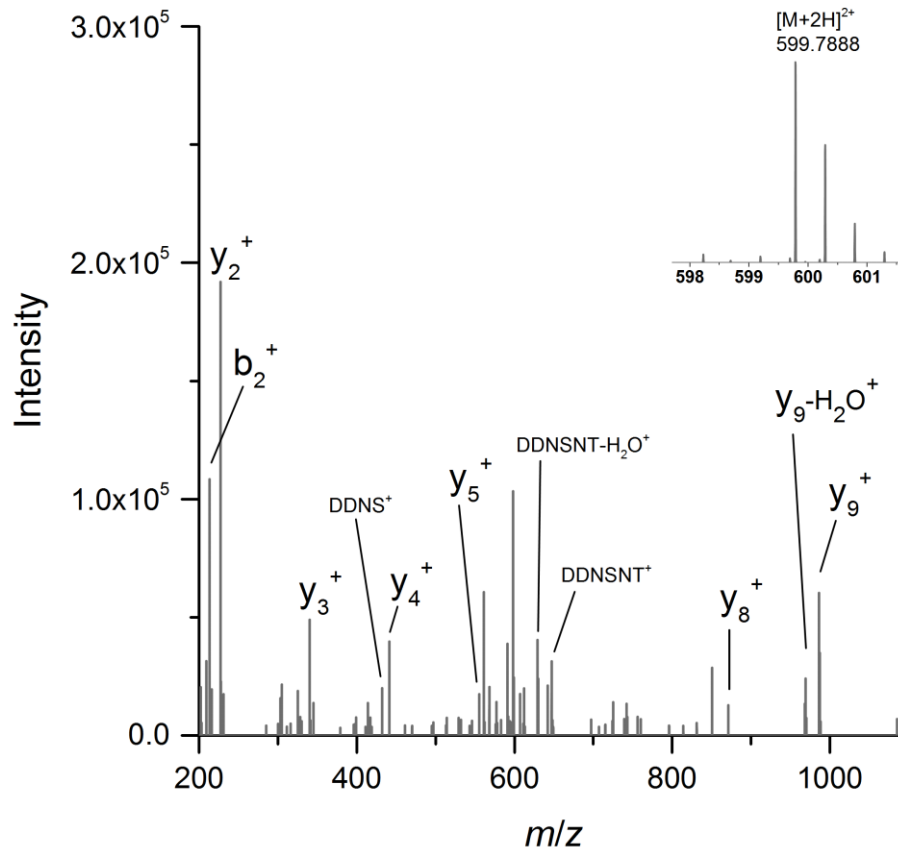

Supplemental Figure S3.24

# DGKDIQLTIDAK

Location: aa 320-331

Precursor Charge State: 3

Theoretical Monoisotopic: 439.5734  $m/z$

Mass Error: 1.1 ppm

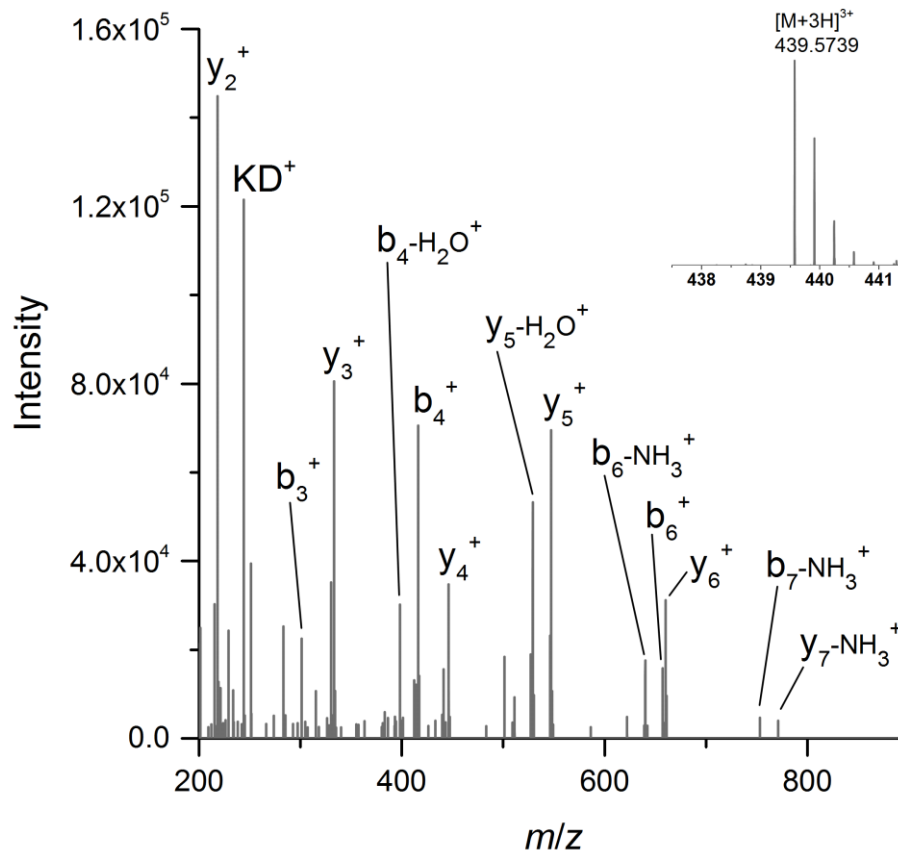

Supplemental Figure S3.25

## DIQLTIDAK

Location: aa 323-331

Precursor Charge State: 2

Theoretical Monoisotopic: 508.7848  $m/z$

Mass Error: 0.6 ppm

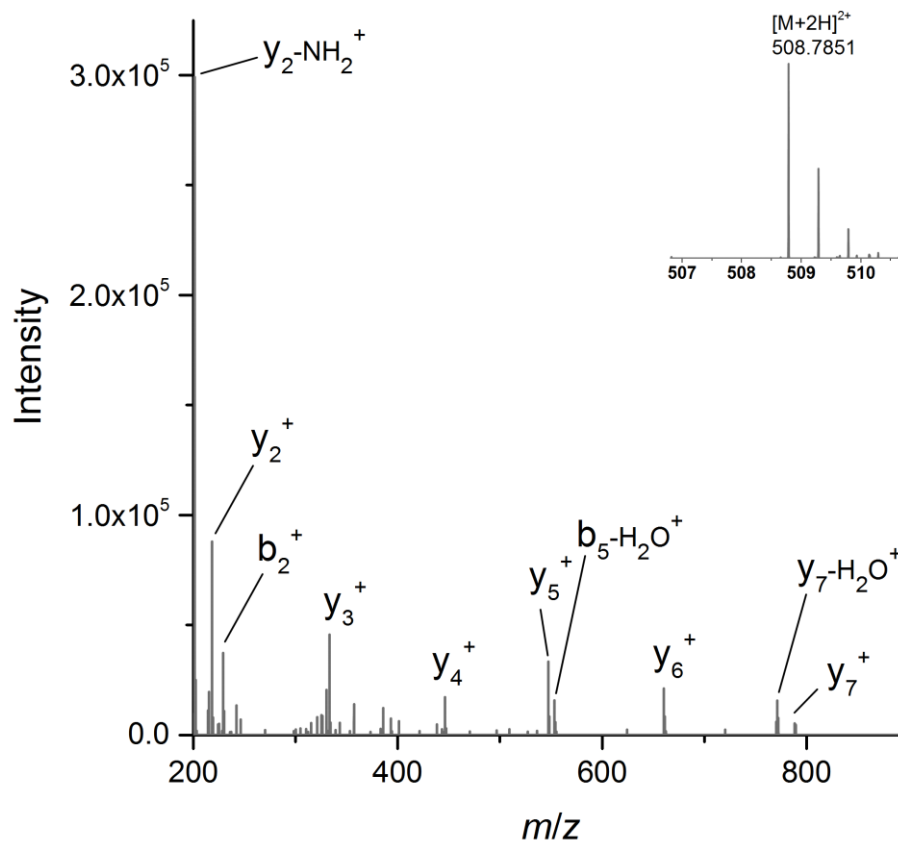

Supplemental Figure S3.26

**NDYGS GTAIHPQTGELLALVSTPSYDVYPFMYGMSNEEY NK**

Location: aa 342-382

Precursor Charge State: 3

Theoretical Monoisotopic: 1521.3613 *m/z*

Mass Error: 3.5 ppm

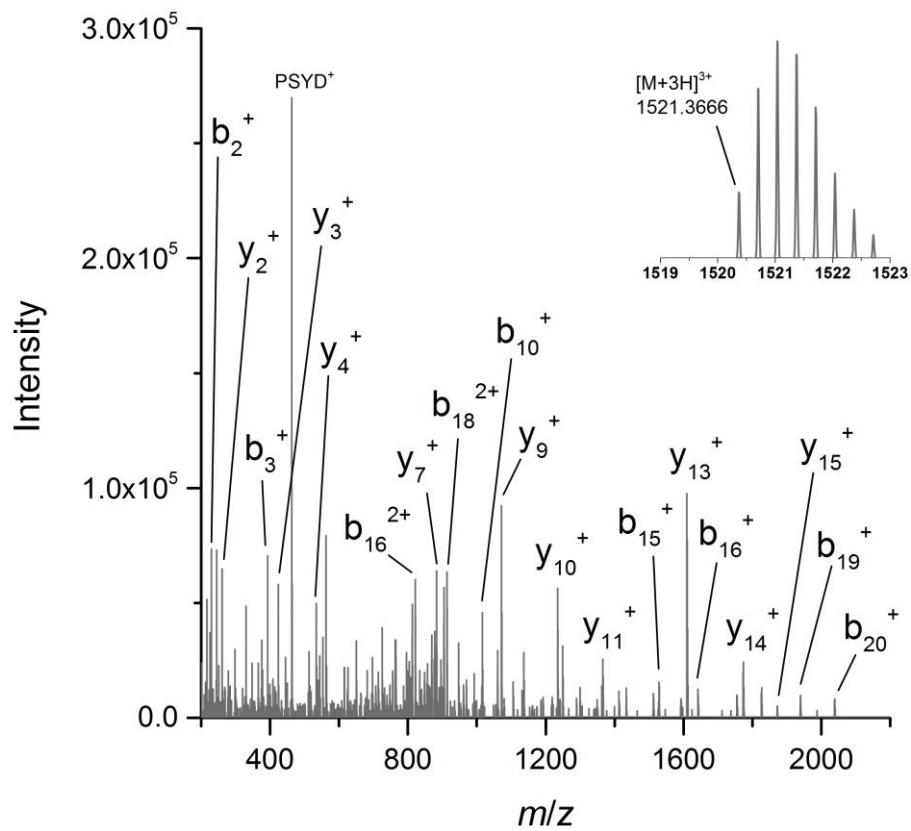

Supplemental Figure S3.27

## SNEEYNKL (Proteinase K)

Location: aa 376-383

Precursor Charge State: 2

Theoretical Monoisotopic: 498.7353  $m/z$

Mass Error: 1.6 ppm

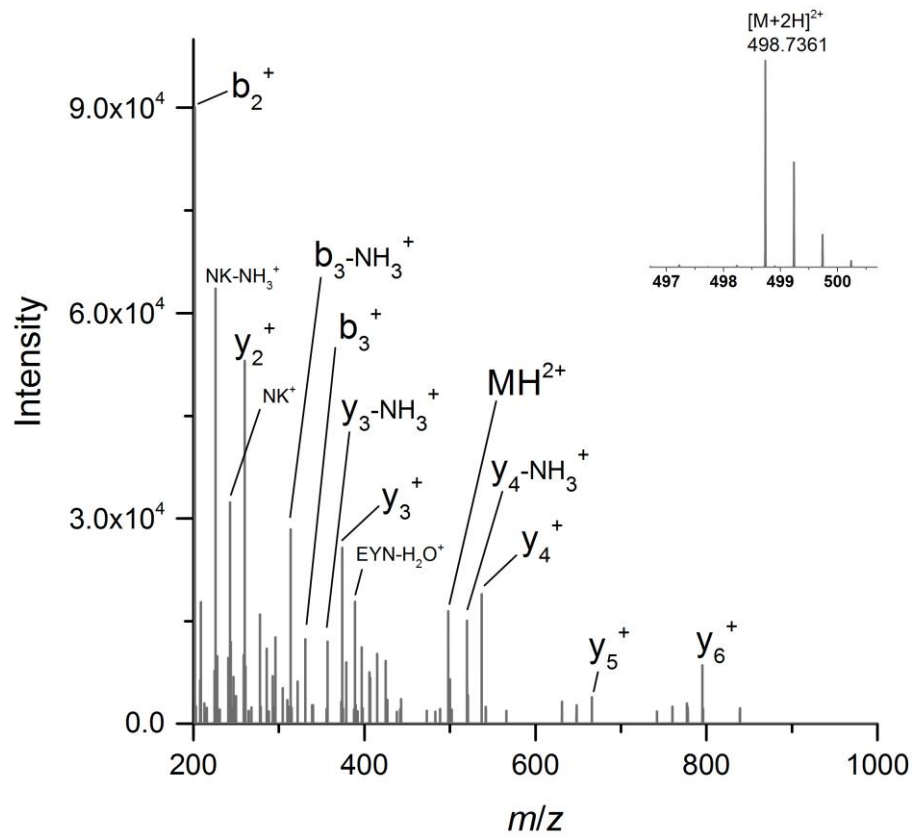

Supplemental Figure S3.28

# LTEDKKEPLLK

Location: aa 383-394

Precursor Charge State: 3

Theoretical Monoisotopic: 476.6083  $m/z$

Mass Error: 3.2 ppm

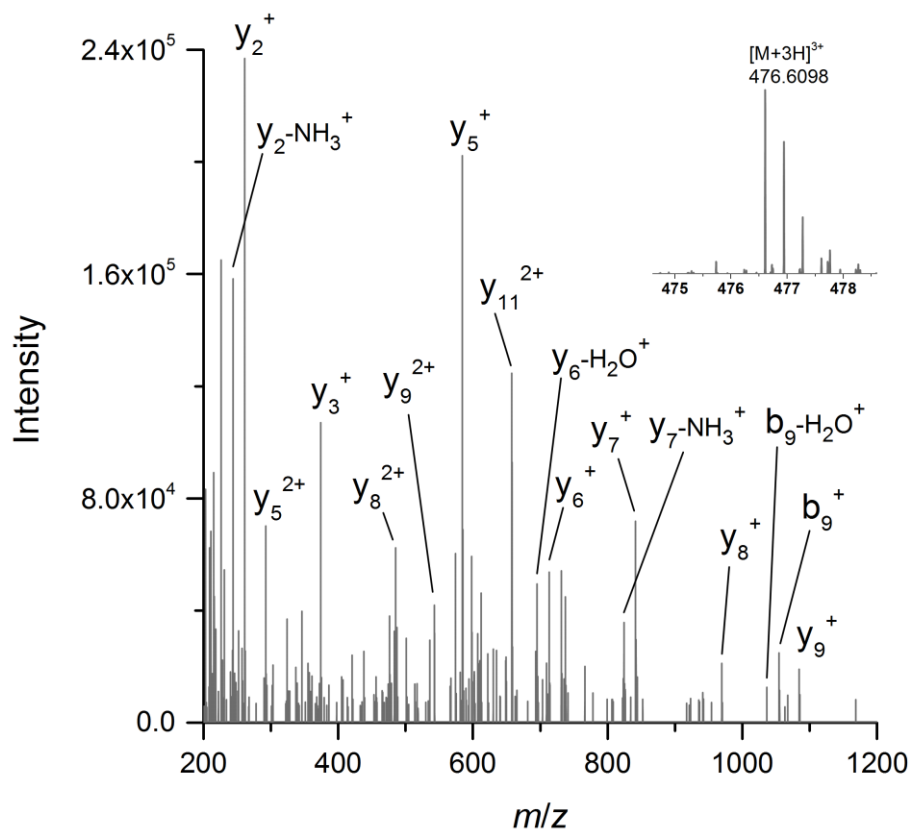

Supplemental Figure S3.29

# FQITTSPGSTQK

Location: aa 395-406

Precursor Charge State: 2

Theoretical Monoisotopic: 647.8355  $m/z$

Mass Error: 0.9 ppm

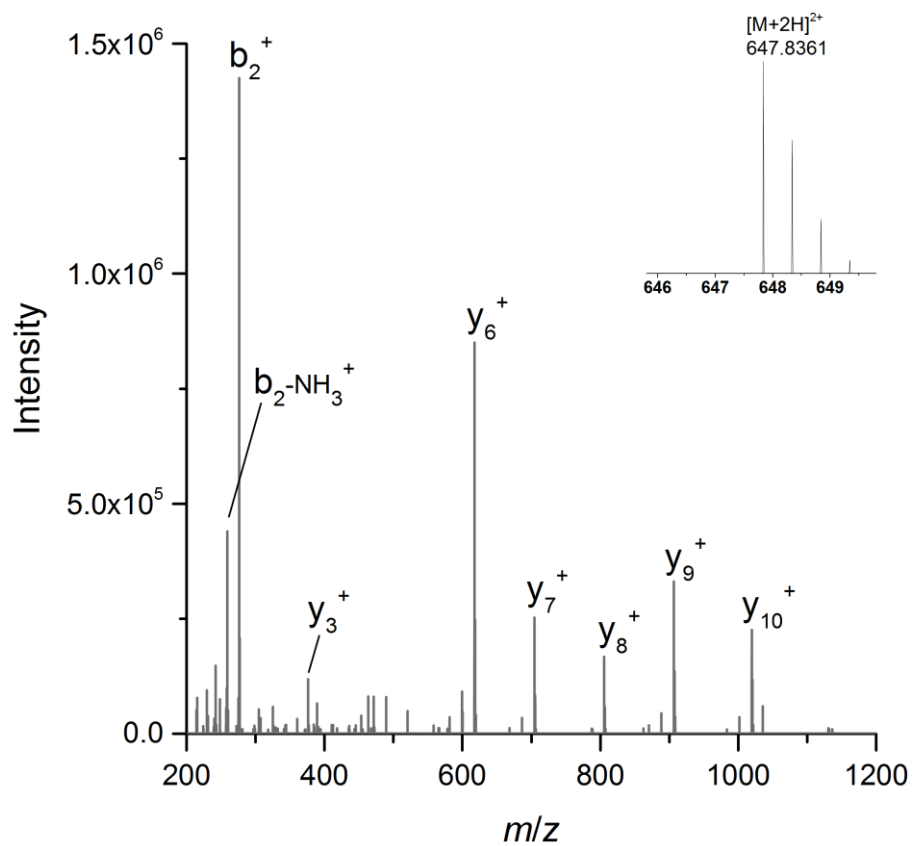



Supplemental Figure S3.30

# ILTAMIGLNNK

Location: aa 407-417

Precursor Charge State: 2

Theoretical Monoisotopic: 594.3445  $m/z$

Mass Error: 0.3 ppm

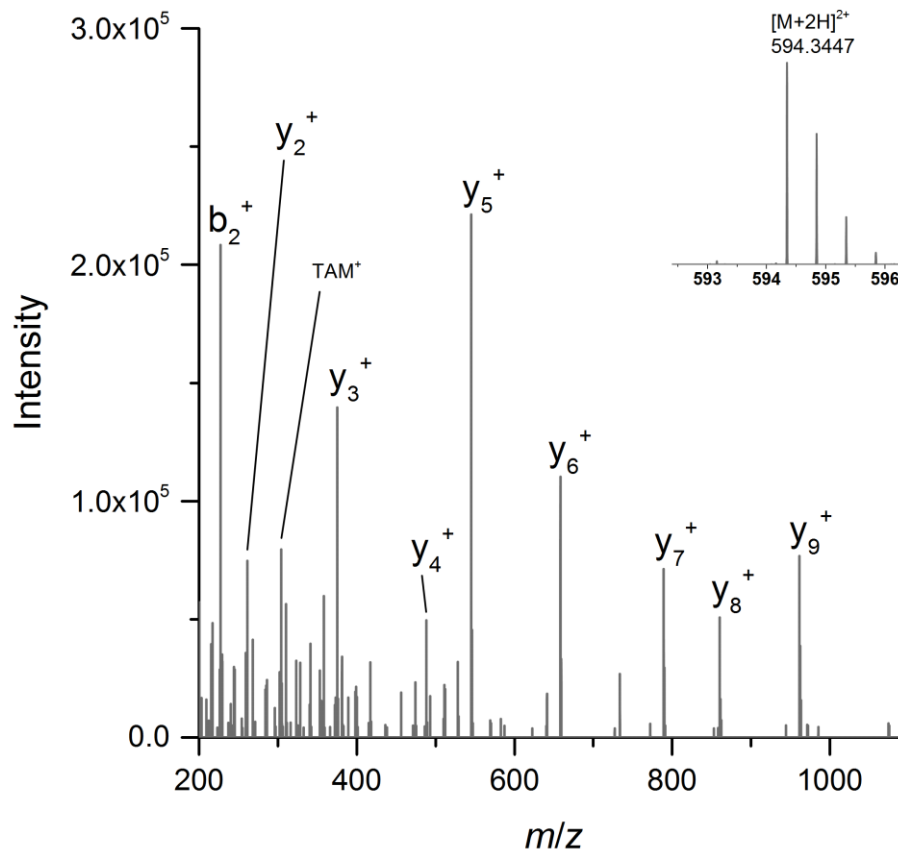

Supplemental Figure S3.31

# ILTAmIGLNNK

Location: aa 407-417

Precursor Charge State: 2

Theoretical Monoisotopic: 602.3419  $m/z$

Mass Error: 2.2 ppm

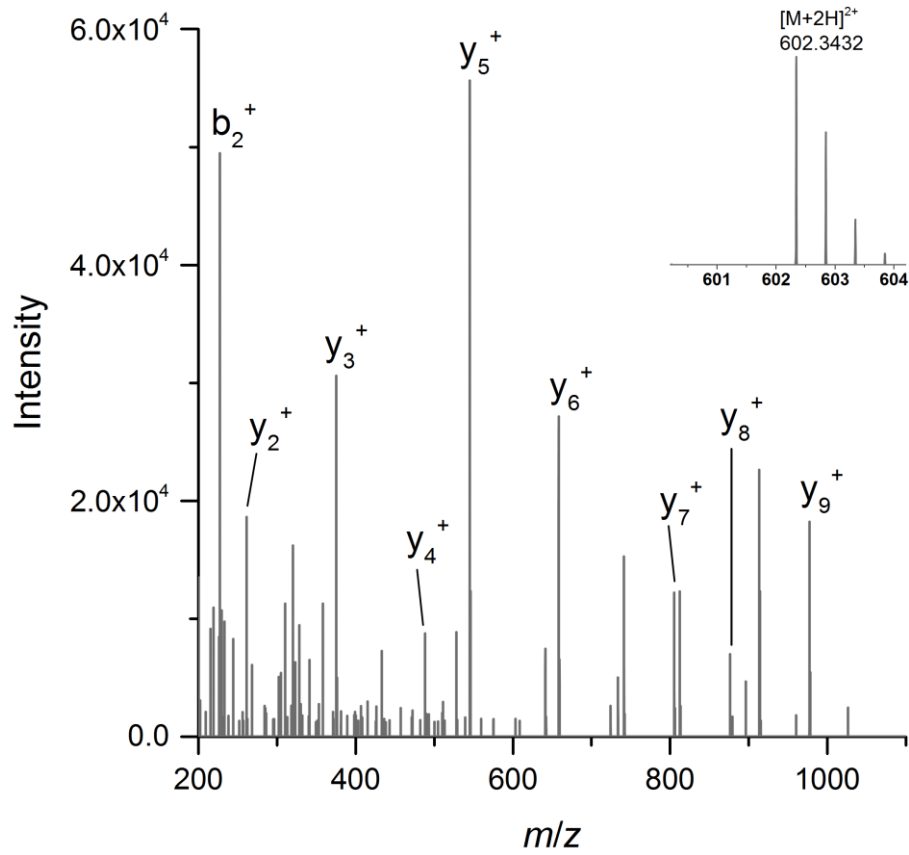

Supplemental Figure S3.32

# TLDDKTSYK

Location: aa 418-426

Precursor Charge State: 3

Theoretical Monoisotopic: 357.5170  $m/z$

Mass Error: 2.5 ppm

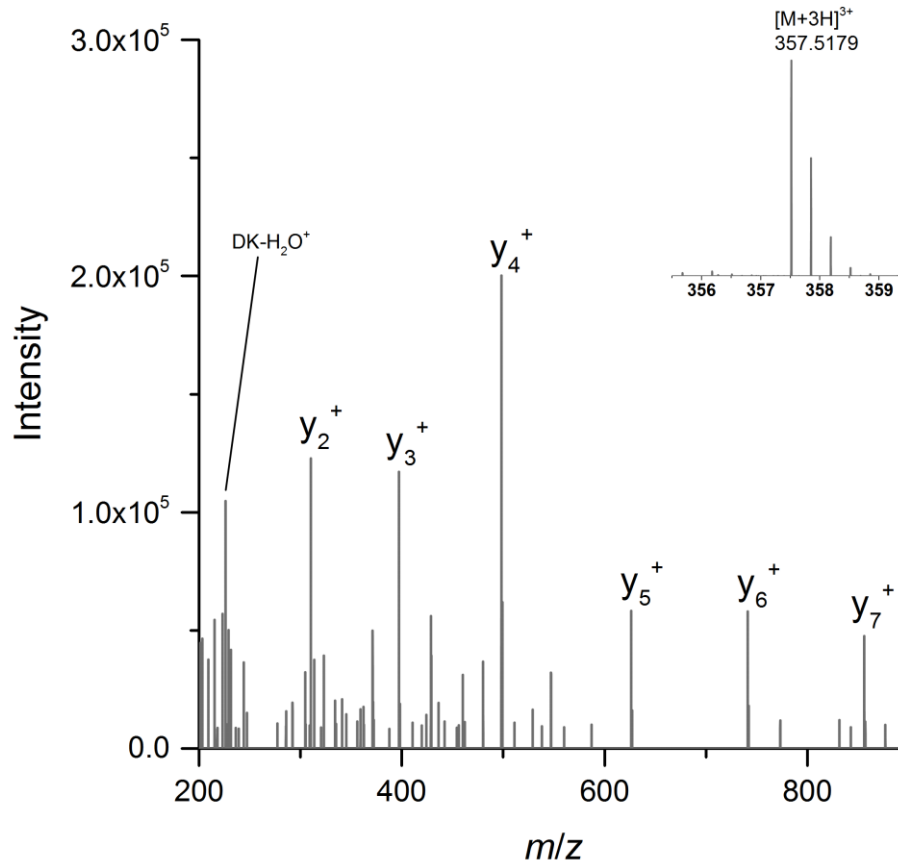

Supplemental Figure S3.33

**DKSWGGINVTR**

Location: aa 435-445

Precursor Charge State: 3

Theoretical Monoisotopic: 428.2107 *m/z*

Mass Error: 1.4 ppm

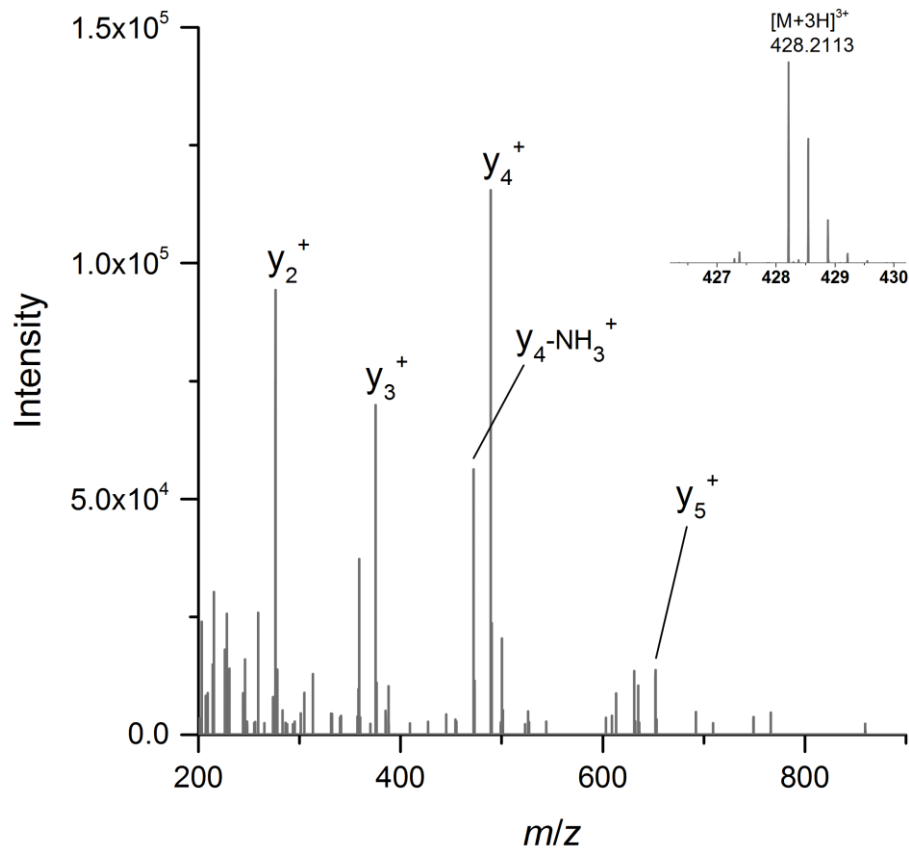

Supplemental Figure S3.34

# YEVVNGNIDLK

Location: aa 446-456

Precursor Charge State: 2

Theoretical Monoisotopic: 632.3326  $m/z$

Mass Error: 0.3 ppm

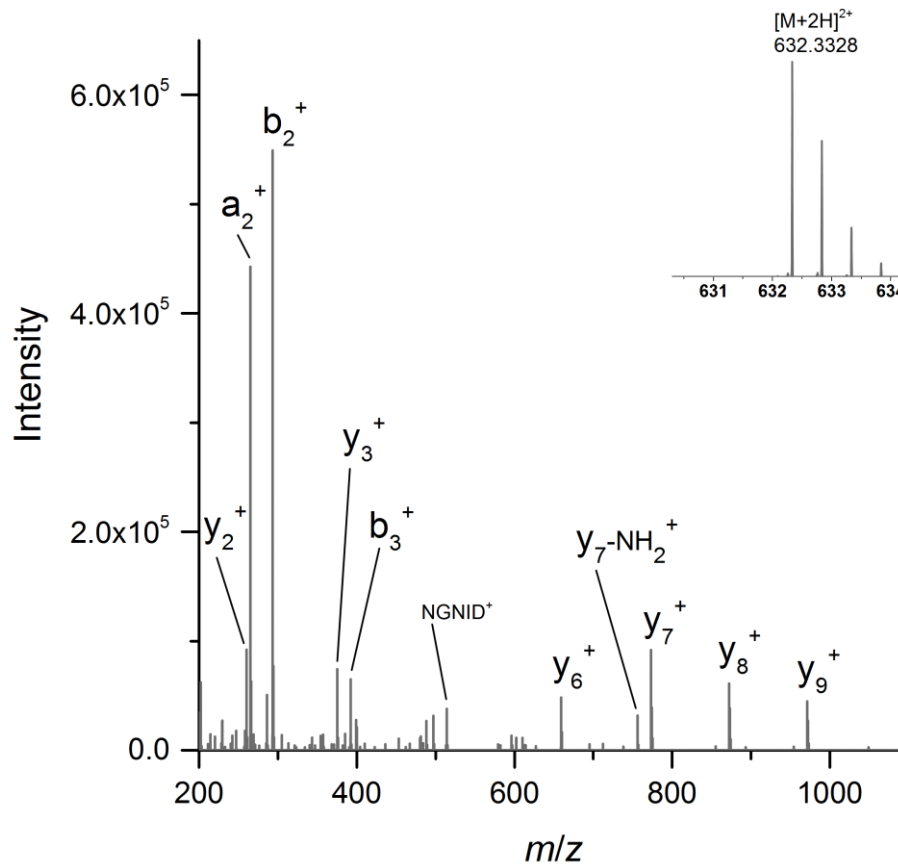

Supplemental Figure S3.35

# QAISSDNIFFAR

Location: aa 457-469

Precursor Charge State: 2

Theoretical Monoisotopic: 749.3703  $m/z$

Mass Error: 2.3 ppm

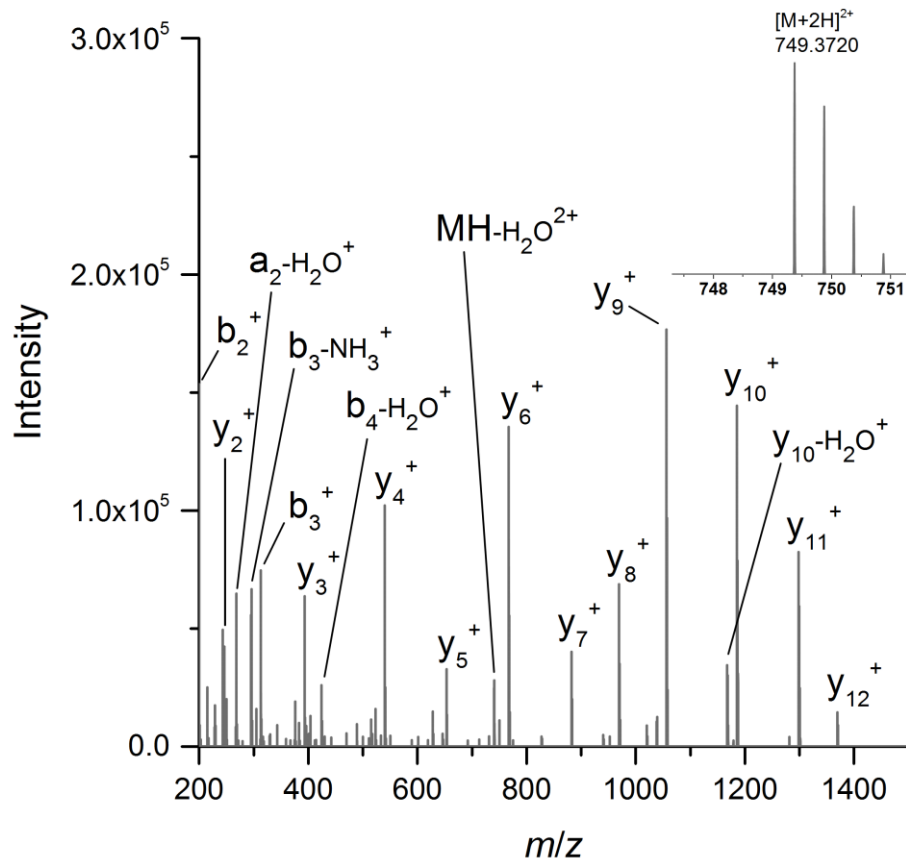

Supplemental Figure S3.36

# VALELGSK

Location: aa 470-477

Precursor Charge State: 2

Theoretical Monoisotopic: 408.7449  $m/z$

Mass Error: 2.2 ppm

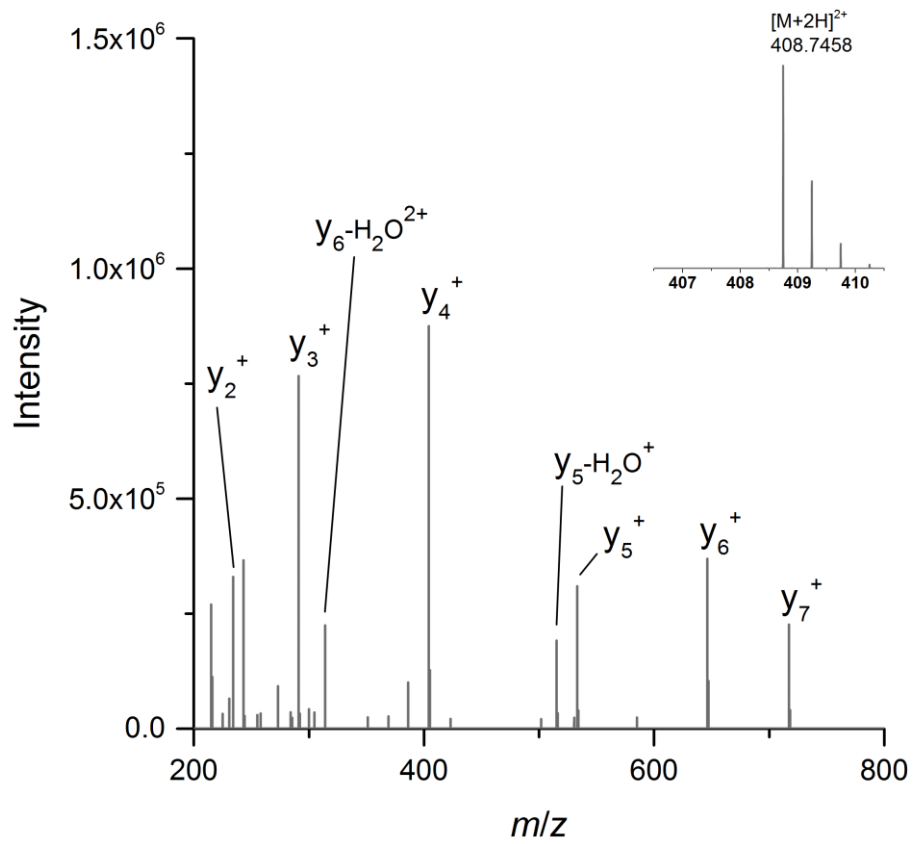

Supplemental Figure S3.37

# KLVGEDIPSDYPFYNAQISNK

Location: aa 485-506

Precursor Charge State: 3

Theoretical Monoisotopic: 819.0762  $m/z$

Mass Error: 1.9 ppm

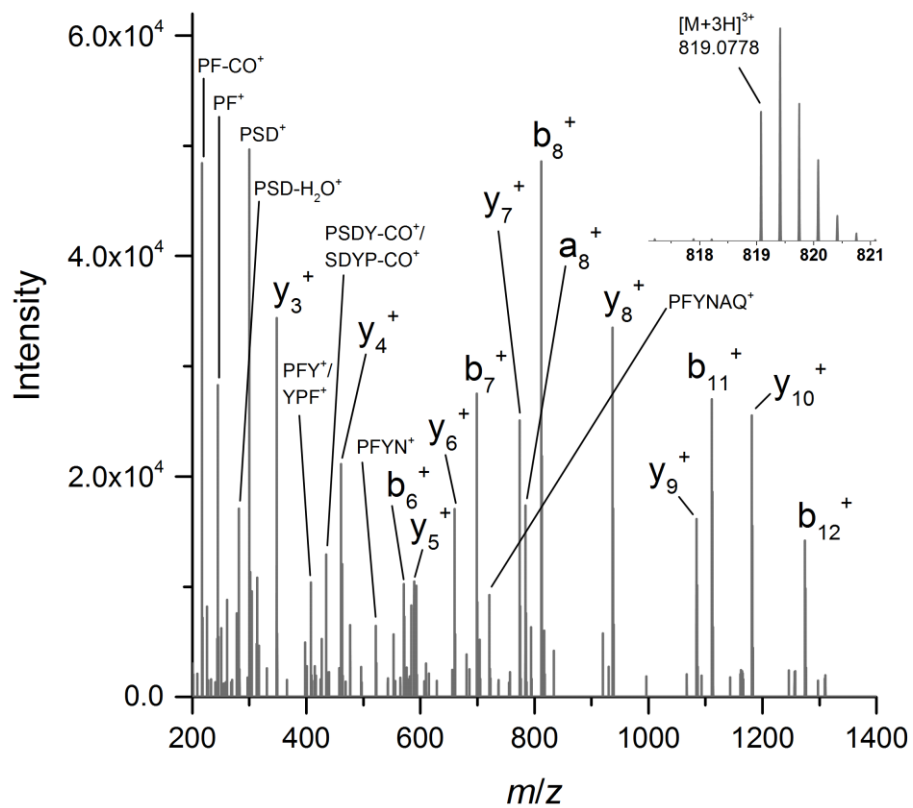



Supplemental Figure S3.38

# LGVGEDIPSDYPFYNAQISNK

Location: aa 486-506

Precursor Charge State: 2

Theoretical Monoisotopic: 776.3779  $m/z$

Mass Error: 2.2 ppm

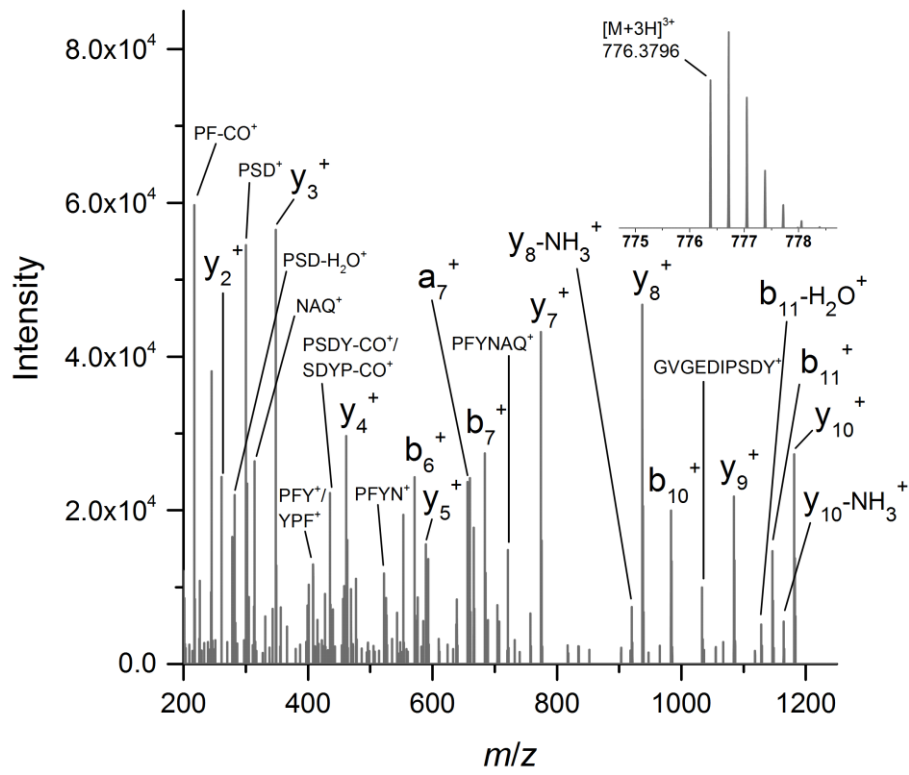

Supplemental Figure S3.39

## NKNLDNEIL (Proteinase K)

Location: aa 505-513

Precursor Charge State: 2

Theoretical Monoisotopic: 536.7853  $m/z$

Mass Error: 1.1 ppm

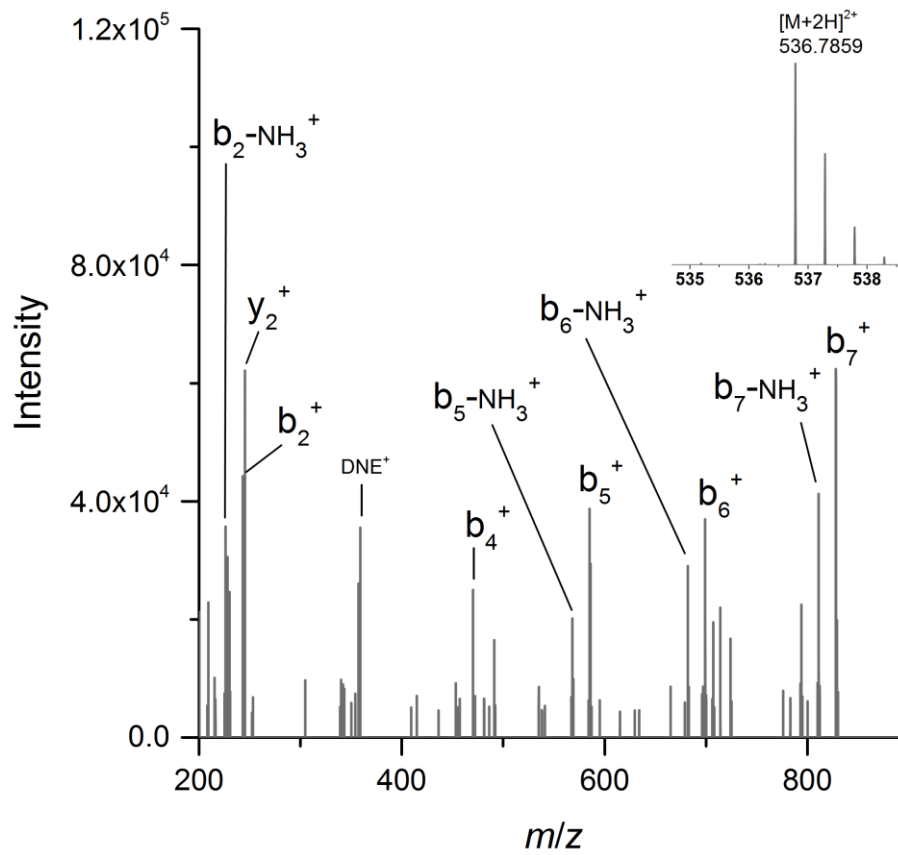

Supplemental Figure S3.40

**NLDNEILLADSGYGQGEILINPVQILSIYSALENNGNINAPHLK**

Location: aa 507-551

Precursor Charge State: 3

Theoretical Monoisotopic: 1620.8521 *m/z*

Mass Error: 2.8 ppm

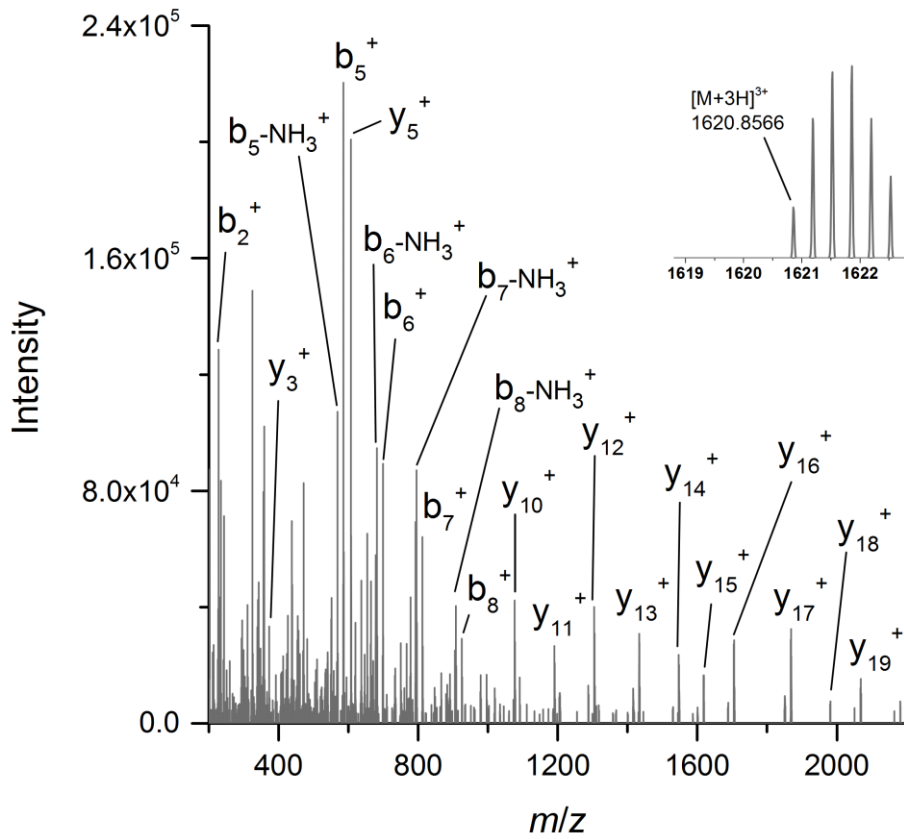

Supplemental Figure S3.41

### THKEDIYRSY (Proteinase K)

Location: aa 582-589

Precursor Charge State: 3

Theoretical Monoisotopic: 437.8824  $m/z$

Mass Error: 1.8 ppm

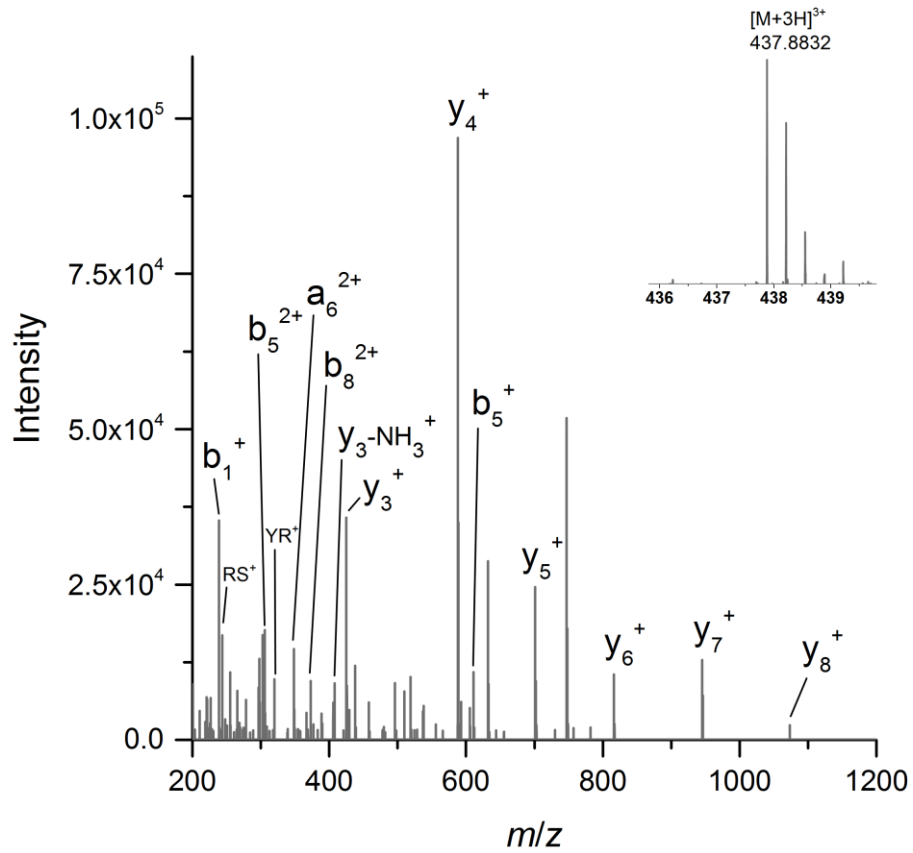

Supplemental Figure S3.42

## THKEDIYR

Location: aa 582-589

Precursor Charge State: 3

Theoretical Monoisotopic: 354.5173 *m/z*

Mass Error: 1.4 ppm

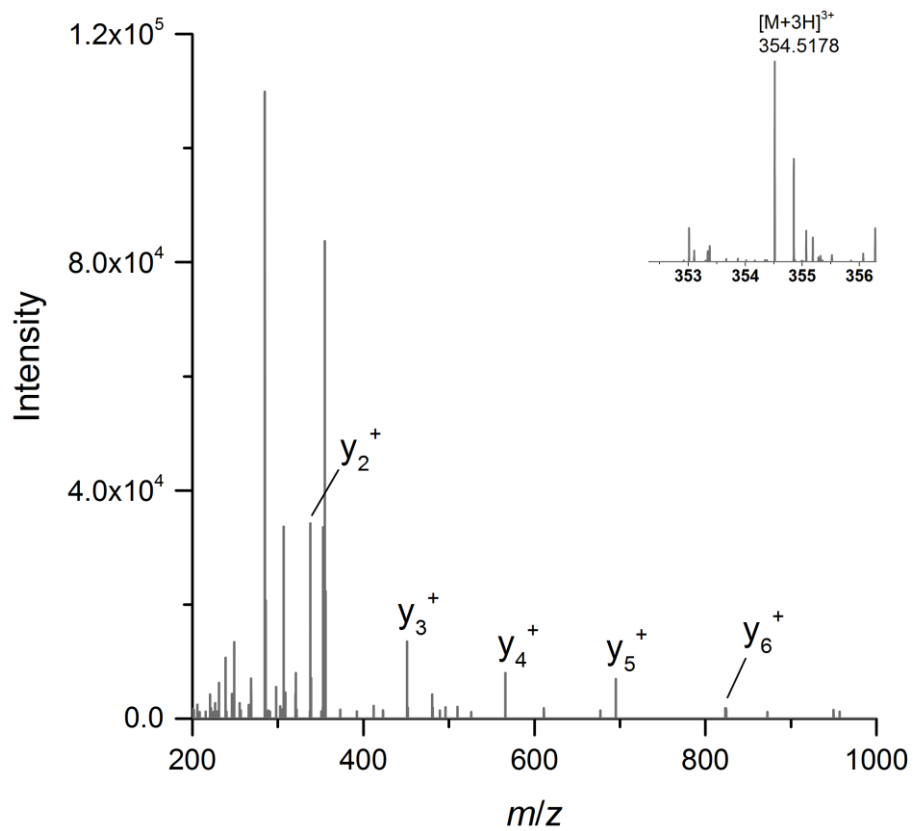

Supplemental Figure S3.43

## HKEDIYRSY (Proteinase K)

Location: aa 583-591

Precursor Charge State: 3

Theoretical Monoisotopic: 404.1999  $m/z$

Mass Error: -0.2 ppm

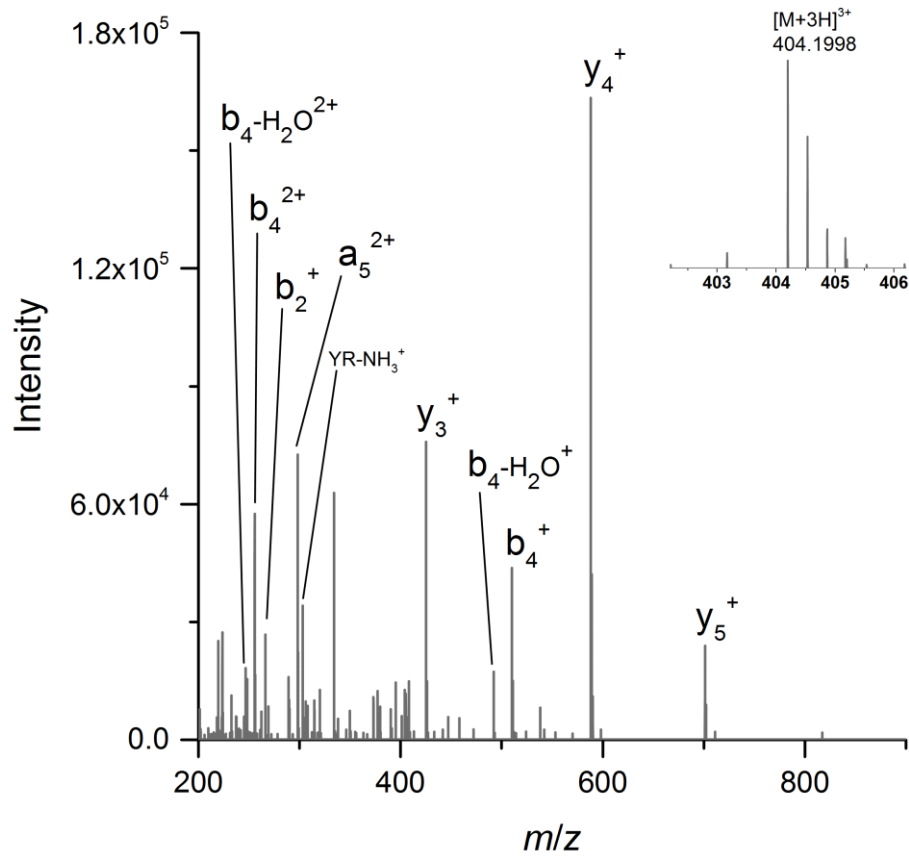

Supplemental Figure S3.44

## SYANLIGK

Location: aa 590-597

Precursor Charge State: 2

Theoretical Monoisotopic: 433.2425  $m/z$

Mass Error: 3.9 ppm

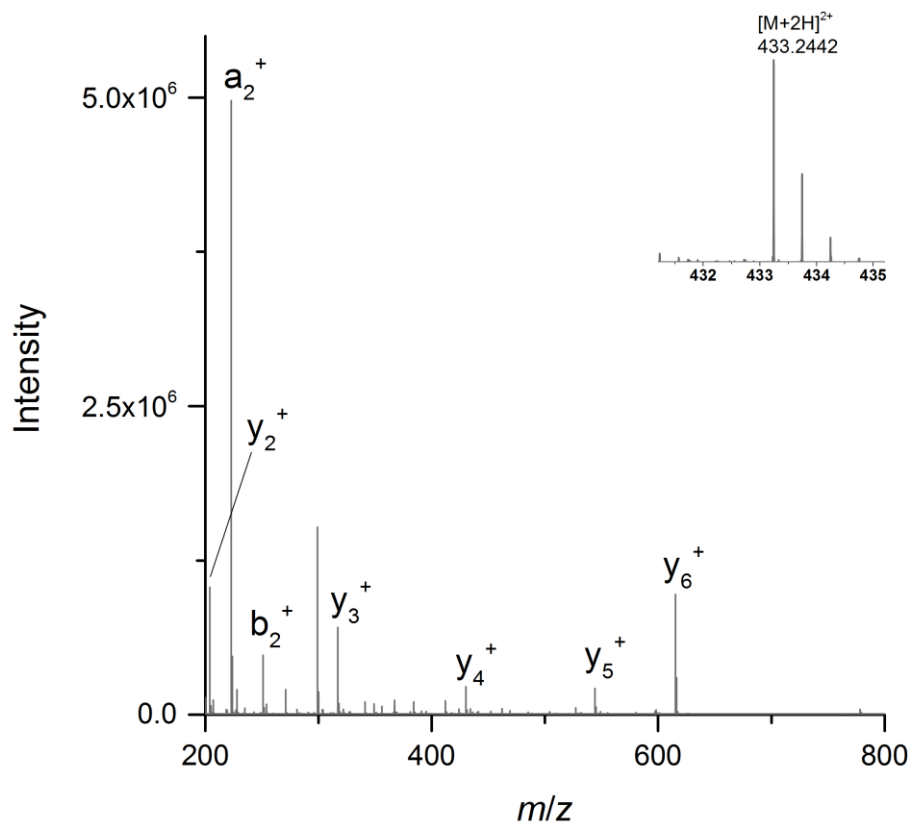

Supplemental Figure S3.45

# SGTAE LK

Location: aa 598-604

Precursor Charge State: 2

Theoretical Monoisotopic: 353.1925  $m/z$

Mass Error: -0.6 ppm

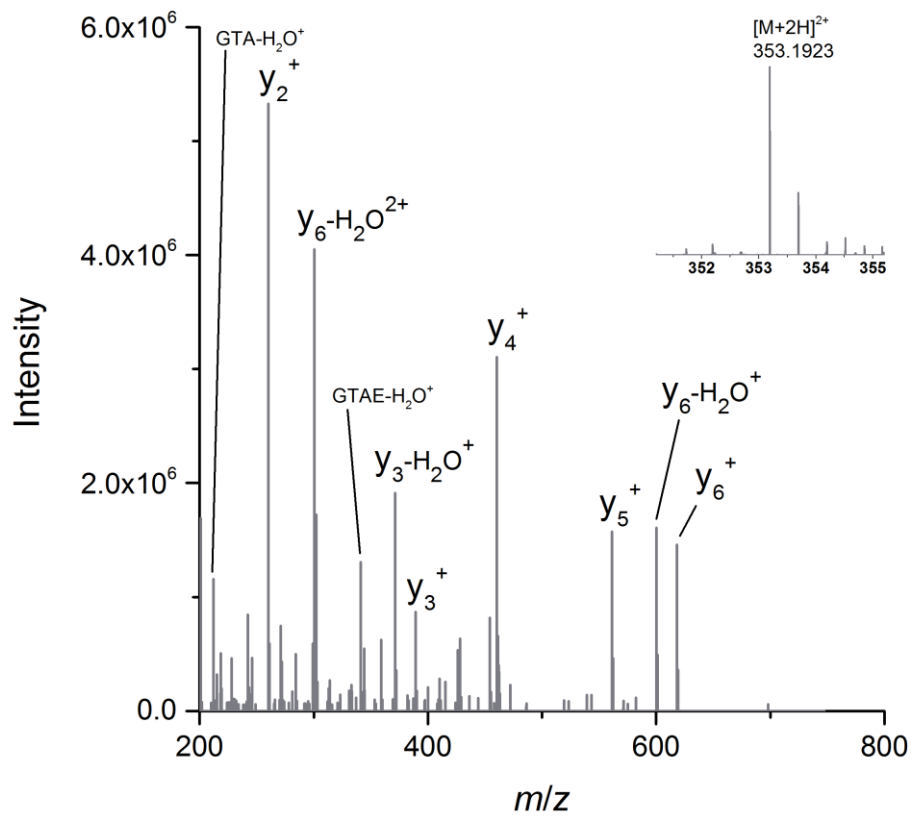



Supplemental Figure S3.46

**QIGWFISYDKDNPnMMMAINVK**

Location: aa 613-634

Precursor Charge State: 3

Theoretical Monoisotopic: 877.7517 *m/z*

Mass Error: -0.1ppm

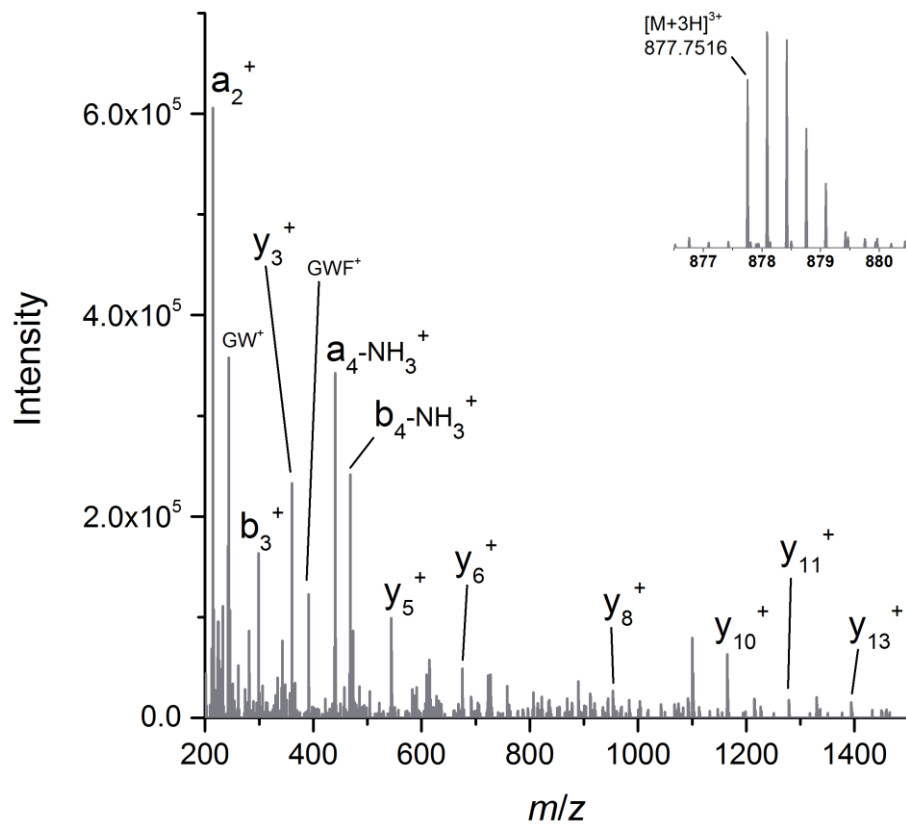

Supplemental Figure S3.47

### ISYDKDNPMM (Proteinase K)

Location: aa 618-628

Precursor Charge State: 2

Theoretical Monoisotopic: 664.2865  $m/z$

Mass Error: 2.0 ppm

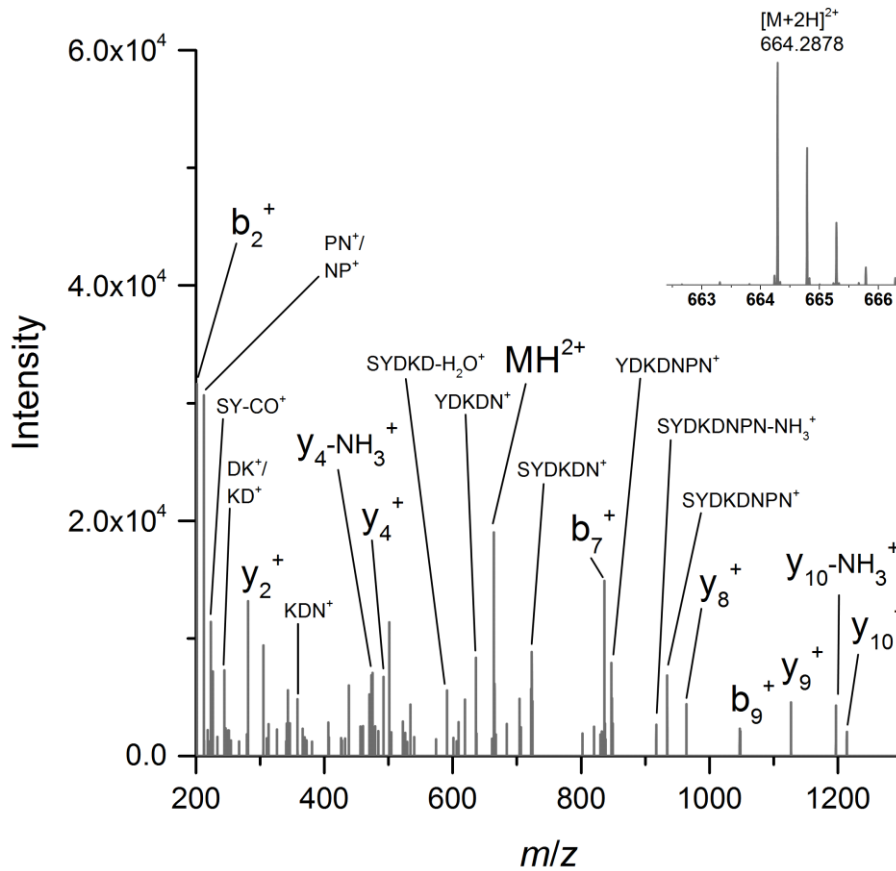

Supplemental Figure S3.48

## YDKDNPMM (Proteinase K)

Location: aa 620-628

Precursor Charge State: 2

Theoretical Monoisotopic: 564.2284  $m/z$

Mass Error: 2.0 ppm

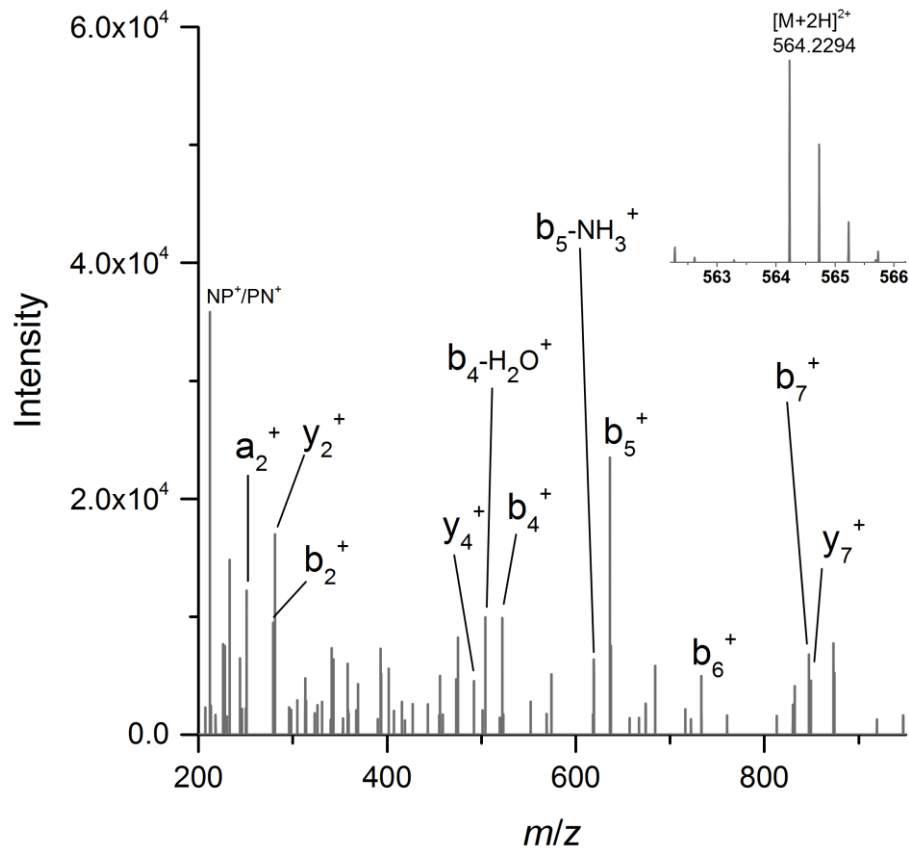

Supplemental Figure S3.49

### DKDNPMM (Proteinase K)

Location: aa 621-628

Precursor Charge State: 2

Theoretical Monoisotopic: 482.6968  $m/z$

Mass Error: 0.8 ppm

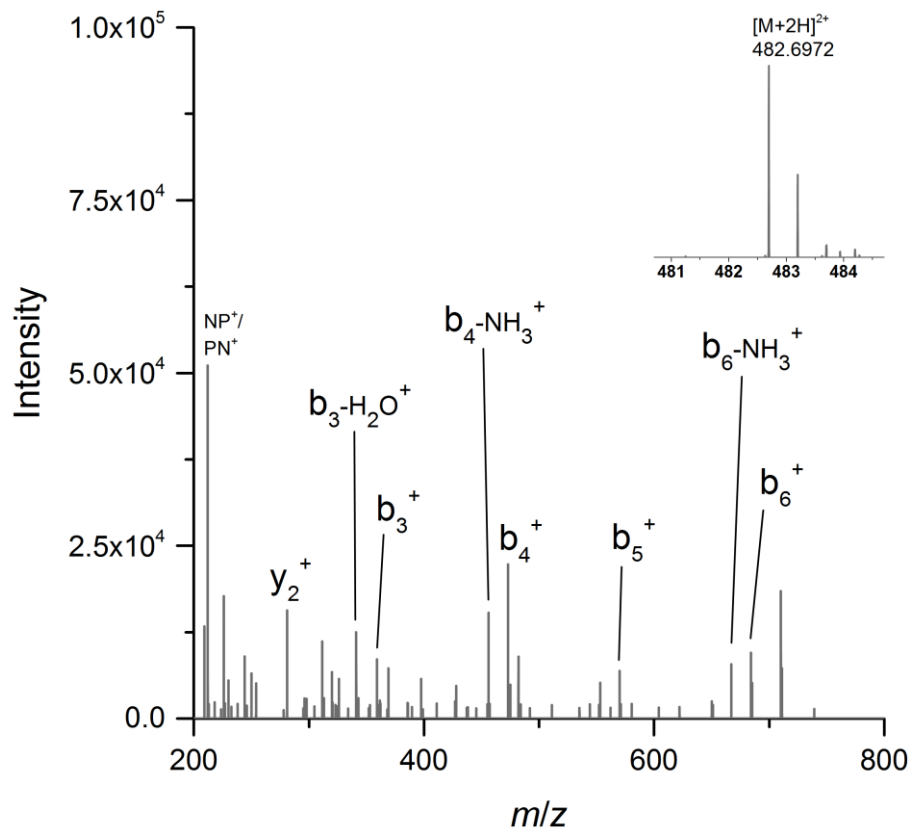

Supplemental Figure S3.50

# GMASYNAK

Location: aa 640-647

Precursor Charge State: 2

Theoretical Monoisotopic: 421.1973  $m/z$

Mass Error: -0.7 ppm

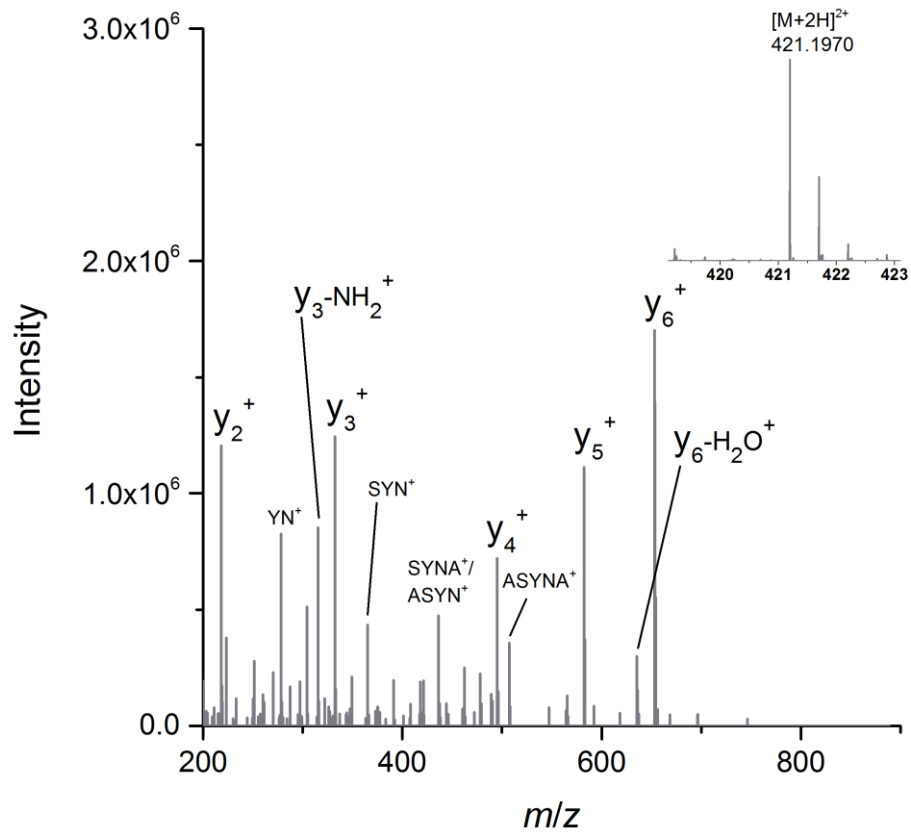

Supplemental Figure S3.51

# VYDELYENGK

Location: aa 652-662

Precursor Charge State: 2

Theoretical Monoisotopic: 672.3093  $m/z$

Mass Error: 1.8 ppm

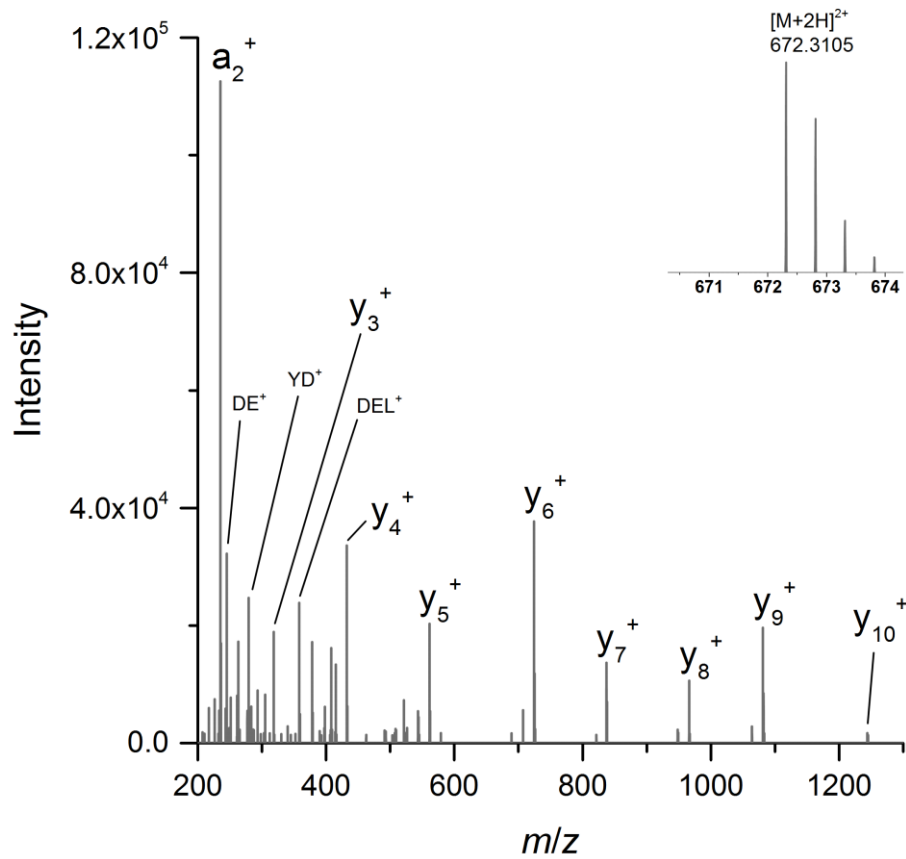

Supplemental Figure S3.52

## KYDIDE

Location: aa 663-668

Precursor Charge State: 2

Theoretical Monoisotopic: 391.6820  $m/z$

Mass Error: -0.5 ppm

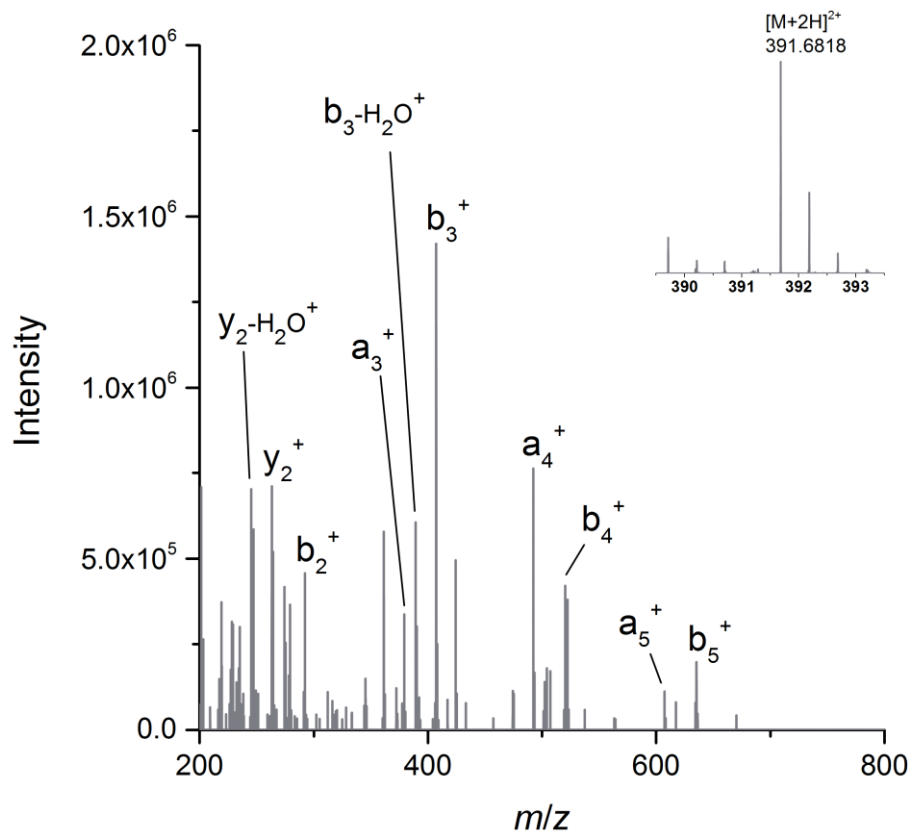

Supplemental Figure S4.

Representative illustration of cyclic peptide rearrangement of source-induced PBP2a<sub>mecA</sub> N-terminal peptide for precursor  $m/z = 653.4382$ .

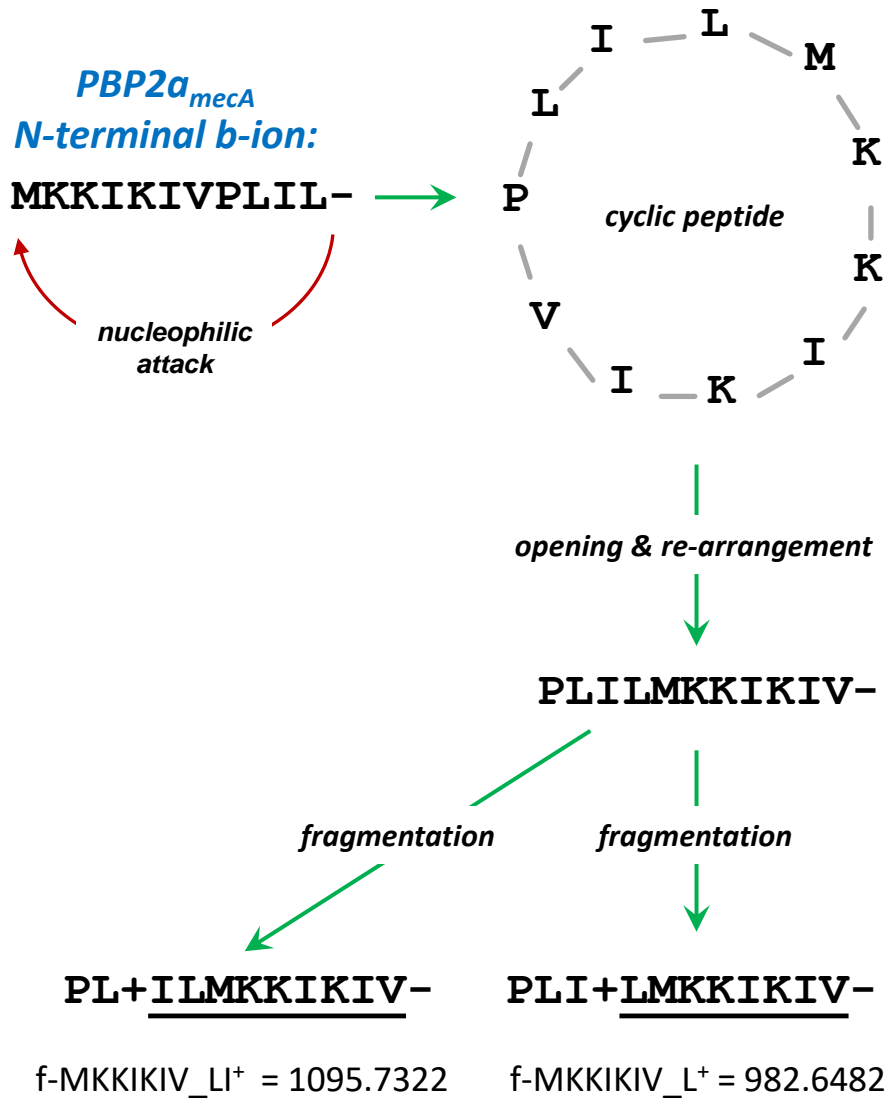



Supplemental Figure S5.

Representative elution profile for PBP2a<sub>mecA</sub> as indicated by the extracted ion chromatogram for the *m/z* 982.6482 transition ion (fMKKIKIV<sub>L</sub><sup>+</sup>) for both source-induced peptide-like targets. This analysis was performed following PBP2a<sub>mecA</sub> enrichment and separation performed on the ProSwift RP-4H at 200  $\mu$ L/min.

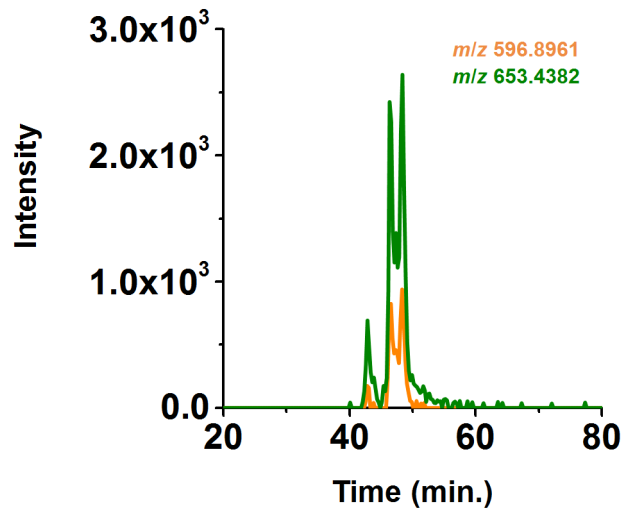

Supplemental Figure S6.

Representative illustration of cyclic peptide rearrangement of source-induced PBP2a<sub>mecC</sub> N-terminal peptide for precursor  $m/z = 715.4462$ .

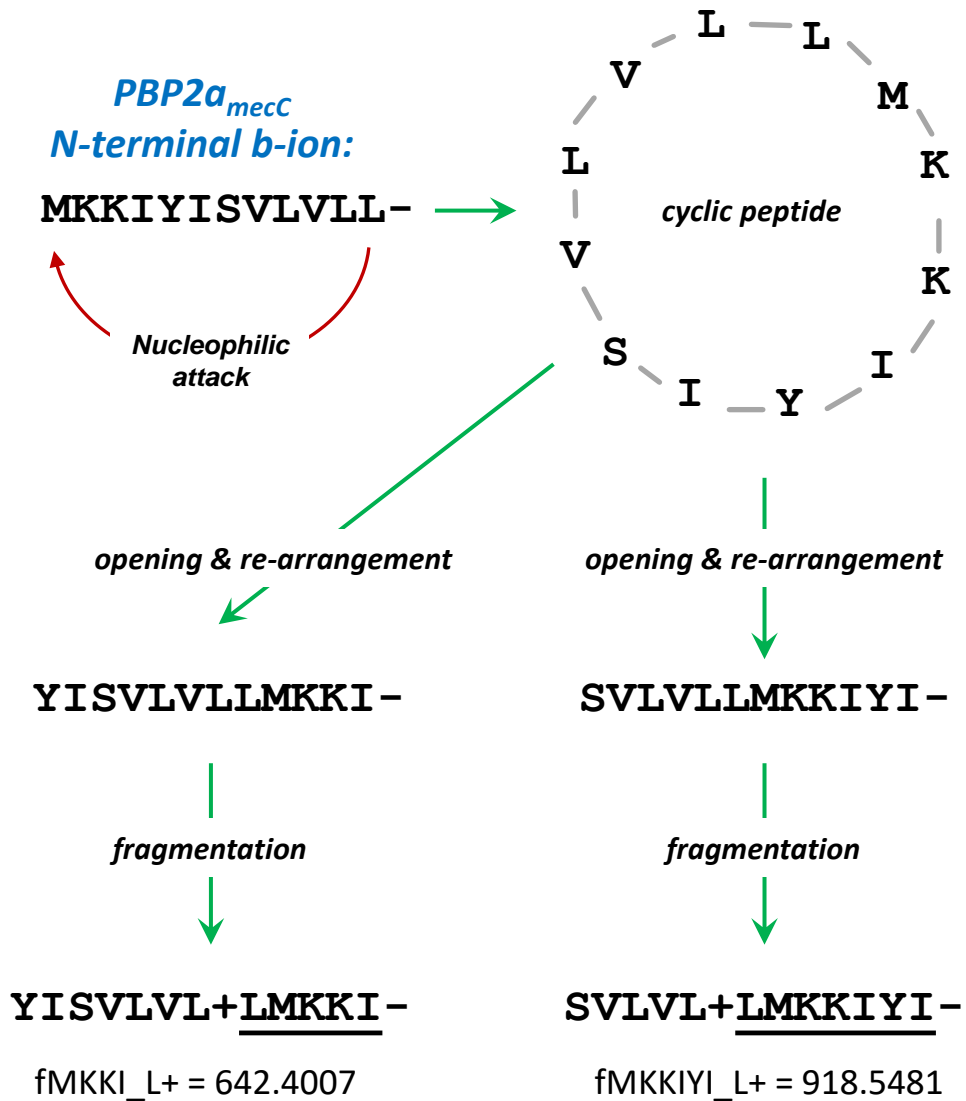

Supplemental Figure S7.

Cross sectional display of reverse phase monolith SPE tip.

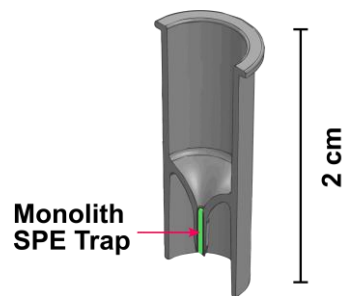

Supplemental Figure S8.

Representative elution profile for PBP2a<sub>mecA</sub> on the monolith solid phase extraction tip as illustrated by extracted ion chromatogram for the *m/z* 982.6482 transition ion (fMKKIKIV<sub>L</sub><sup>+</sup>) for both source-induced peptide-like targets. Acetonitrile gradient is indicated by the blue line. Protein separation was performed at 3  $\mu$ L/min.

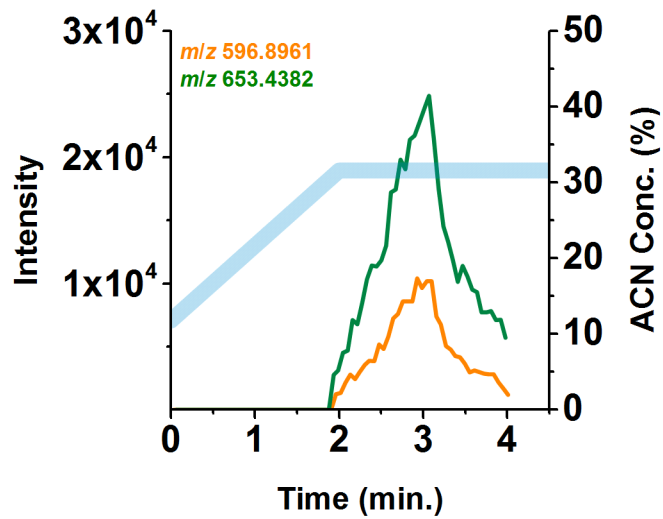

Supplement: 41598_2021_97844_MOESM1_ESM.pdf [file 41598_2021_97844_MOESM1_ESM.pdf]
